# Supplementary material for: Automated 3D structure composition for large RNAs
Source: PubMed Central journal article supplement — Nucleic Acids Res. 2012 Apr 26;40(14):e112. doi: 10.1093/nar/gks339 (PMC3413140; doi:10.1093/nar/gks339), 2012-04-26
Supplement: supp_gks339_nar-00093-met-h-2012-File002.pdf [file supp_gks339_nar-00093-met-h-2012-File002.pdf]

## SUPPLEMENTARY DATA

### Automated 3D structure composition for large RNAs

Mariusz Popenda<sup>1</sup>, Marta Szachniuk<sup>2,3</sup>, Maciej Antczak<sup>3</sup>, Katarzyna J. Purzycka<sup>1</sup>,  
Piotr Lukasiak<sup>2,3</sup>, Natalia Bartol<sup>3</sup>, Jacek Blazewicz<sup>2,3</sup> and Ryszard W. Adamiak<sup>1\*</sup>

<sup>1</sup> Laboratory of Structural Chemistry of Nucleic Acids, Institute of Bioorganic Chemistry,  
Polish Academy of Sciences, Poznan, 61-704 Poland,

<sup>2</sup> Laboratory of Bioinformatics, Institute of Bioorganic Chemistry,  
Polish Academy of Sciences, Poznan, Poland,

<sup>3</sup> Institute of Computing Science, Poznan University of Technology, Poznan, 60-965, Poland

***Supplementary Data are available at NAR online:***

Supplementary tables S1-S9

Supplementary figures S1-S3

Supplementary dataset S1

**TABLE S1.** The RNA secondary structure fragmentation based on its tree graph representation. The 5S rRNA secondary structure as an example

| 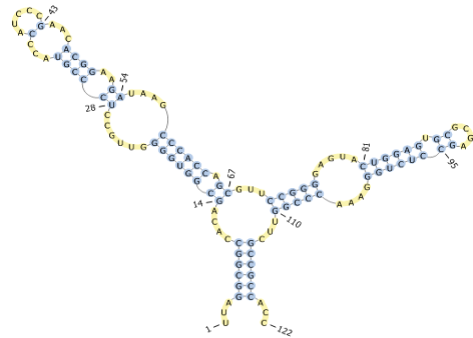 <p>5S rRNA <i>H. Marismortui</i> secondary structure derived from the X-ray structure (PDB ID 1FFK)</p> |                     |        |           |  <p>5S rRNA tree graph representation (numbered)</p> |                 |                                                    |                          |                         |
|-------------------------------------------------------------------------------------------------------------------------------------------------------------------------------------------|---------------------|--------|-----------|----------------------------------------------------------------------------------------------------------------------------------------|-----------------|----------------------------------------------------|--------------------------|-------------------------|
| Graph element                                                                                                                                                                             | Structure element   |        | Size [nt] | In-secondary structure localization                                                                                                    |                 | RNA FRABASE dictionary input pattern <sup>a)</sup> |                          |                         |
|                                                                                                                                                                                           |                     |        |           | first residue                                                                                                                          | last residue    | strand name                                        | secondary structure      |                         |
|                                                                                                                                                                                           |                     |        |           |                                                                                                                                        |                 |                                                    | sequence                 | topology                |
| <b>vertices</b>                                                                                                                                                                           |                     |        |           |                                                                                                                                        |                 |                                                    |                          |                         |
| 0                                                                                                                                                                                         | single strands      | 5' end | 4         | 1                                                                                                                                      | 4               | strand1                                            | ^UUAG                    | ^...(<br>)...\$         |
|                                                                                                                                                                                           |                     | 3' end | 4         | 119                                                                                                                                    | 122             | strand2                                            | CACC\$                   | )...\$                  |
| 1                                                                                                                                                                                         | 3-way junction loop |        | 16        | 9<br>67<br>110                                                                                                                         | 14<br>71<br>114 | strand1<br>strand2<br>strand3                      | CCACAG<br>CGUUC<br>GUUCG | (...(<br>)...(<br>)...) |
| 2                                                                                                                                                                                         | bulge               |        | 5         | 15<br>64                                                                                                                               | 16<br>66        | strand1<br>strand2                                 | CG<br>CAG                | ((<br>).)               |
| 3                                                                                                                                                                                         | internal loop       |        | 14        | 21<br>54                                                                                                                               | 29<br>59        | strand1<br>strand2                                 | GGUUGCCU<br>AUAAGC       | (.....(<br>)....)       |
| 4                                                                                                                                                                                         | bulge               |        | 6         | 29<br>50                                                                                                                               | 30<br>53        | strand1<br>strand2                                 | CC<br>GAAG               | ((<br>)..)              |
| 5                                                                                                                                                                                         | internal loop       |        | 10        | 33<br>43                                                                                                                               | 37<br>47        | strand1<br>strand2                                 | UACCC<br>GAACA           | (...(<br>)....)         |
| 6                                                                                                                                                                                         | hairpin loop        |        | 7         | 37                                                                                                                                     | 43              | strand1                                            | CAUCCCG                  | (.....)                 |
| 7                                                                                                                                                                                         | internal loop       |        | 13        | 75<br>101                                                                                                                              | 81<br>106       | strand1<br>strand2                                 | GGAGUAC<br>GGAAAC        | (.....(<br>)....)       |
| 8                                                                                                                                                                                         | bulge               |        | 5         | 86<br>95                                                                                                                               | 88<br>96        | strand1<br>strand2                                 | GUG<br>CC                | (.<br>))                |
| 9                                                                                                                                                                                         | hairpin             |        | 6         | 89                                                                                                                                     | 94              | strand1                                            | CGCGAG                   | (.....)                 |
| <b>edges</b>                                                                                                                                                                              |                     |        |           |                                                                                                                                        |                 |                                                    |                          |                         |
| 1                                                                                                                                                                                         | stem                |        | 12        | 4<br>114                                                                                                                               | 9<br>119        | strand1<br>strand2                                 | GGCGGC<br>GCCGCC         | (((((<br>))))))         |
| 2                                                                                                                                                                                         | stem                |        | 4         | 14<br>66                                                                                                                               | 15<br>67        | strand1<br>strand2                                 | GC<br>GC                 | ((<br>))                |
| 3                                                                                                                                                                                         | stem                |        | 12        | 16<br>59                                                                                                                               | 21<br>64        | strand1<br>strand2                                 | GGUGGG<br>CCCACC         | (((((<br>))))))         |
| 4                                                                                                                                                                                         | stem                |        | 4         | 28<br>53                                                                                                                               | 29<br>54        | strand1<br>strand2                                 | UC<br>GA                 | ((<br>))                |
| 5                                                                                                                                                                                         | stem                |        | 8         | 30<br>47                                                                                                                               | 33<br>50        | strand1<br>strand2                                 | CCGU<br>ACGG             | (((<br>)))              |
| 6                                                                                                                                                                                         | single base pair    |        | 2         | 37<br>43                                                                                                                               | 37<br>43        | strand1<br>strand2                                 | C<br>G                   | (<br>)                  |
| 7                                                                                                                                                                                         | stem                |        | 10        | 71<br>106                                                                                                                              | 75<br>110       | strand1<br>strand2                                 | CCGGG<br>CCCGG           | (((((<br>))))))         |
| 8                                                                                                                                                                                         | stem                |        | 12        | 81<br>96                                                                                                                               | 86<br>101       | strand1<br>strand2                                 | CUGGAG<br>CUCUGG         | (((((<br>))))))         |
| 9                                                                                                                                                                                         | stem                |        | 4         | 88<br>94                                                                                                                               | 89<br>95        | strand1<br>strand2                                 | GC<br>GC                 | ((<br>))                |

<sup>a)</sup> notation as reported in the RNA FRABASE (25)

**TABLE S2.** The RNA FRABASE dictionary statistics of secondary structure and tertiary structure elements

| Structure element      | Number of elements <sup>a)</sup> |                    |                             |
|------------------------|----------------------------------|--------------------|-----------------------------|
|                        | secondary structure elements     |                    | tertiary structure elements |
|                        | sequence not specified           | sequence specified |                             |
| <b>Loops:</b>          |                                  |                    |                             |
| hairpin                | 35                               | 1,525              | 21,869                      |
| bulge and internal     | 338                              | 5,458              | 70,604                      |
| 3-way junction         | 889                              | 1,874              | 13,740                      |
| 4-way                  | 928                              | 1,422              | 8,584                       |
| 5-way                  | 720                              | 910                | 6,580                       |
| 6-way                  | 174                              | 210                | 1,164                       |
| 7-way                  | 336                              | 392                | 1,680                       |
| 8-way                  | 112                              | 128                | 200                         |
| 9-way                  | 27                               | 27                 | 27                          |
| 10-way                 | 40                               | 50                 | 50                          |
| 11-way                 | 217                              | 230                | 231                         |
| 12-way                 | 48                               | 58                 | 60                          |
| 14-way                 | 14                               | 14                 | 14                          |
| <b>Stems</b>           | 17                               | 1,828              | 63,417                      |
| <b>Single strands:</b> |                                  |                    |                             |
| 5'-end                 | 10                               | 38                 | 155                         |
| 3'-end                 | 30                               | 187                | 1,387                       |
| linking domains        | 21                               | 113                | 1,166                       |
| <b>All</b>             | <b>3,956</b>                     | <b>14,464</b>      | <b>190,928</b>              |

<sup>a)</sup> In order to increase the number of items in the dictionary, strand shift operation (25) was applied for such elements like bulges, internal and n-way junction loops.

**TABLE S3.** Statistical analysis of machine translation steps and properties of the 3D models predicted for a set of 95 RNAs with randomized sequence

| No. | Strand length [nt] | Fragmentation<br>number of secondary structure elements |                |       |       | In-dictionary search<br>number of secondary structure elements |              |         | Refinement<br>number of final 3D models |      |             | Secondary structure conservation [MCC] <sup>a)</sup> | Precision r.m.s.d. [Å] <sup>b)</sup> |
|-----|--------------------|---------------------------------------------------------|----------------|-------|-------|----------------------------------------------------------------|--------------|---------|-----------------------------------------|------|-------------|------------------------------------------------------|--------------------------------------|
|     |                    | total                                                   | single strands | loops | stems | found with sequence similarity                                 |              | missing | refined with energy                     |      | not refined |                                                      |                                      |
|     |                    |                                                         |                |       |       | complete                                                       | not complete |         | low                                     | high |             |                                                      |                                      |
| 1   | 30                 | 4                                                       | 2              | 1     | 1     | 0                                                              | 4            | 0       | 10                                      | 0    | 0           | 1.00                                                 | 1.9                                  |
| 2   | 35                 | 5                                                       | 1              | 2     | 2     | 1                                                              | 4            | 0       | 10                                      | 0    | 0           | 1.00                                                 | 2.0                                  |
| 3   | 40                 | 3                                                       | 1              | 1     | 1     | 1                                                              | 2            | 0       | 10                                      | 0    | 0           | 1.00                                                 | 1.4                                  |
| 4   | 45                 | 8                                                       | 2              | 3     | 3     | 3                                                              | 5            | 0       | 10                                      | 0    | 0           | 1.00                                                 | 2.0                                  |
| 5   | 50                 | 6                                                       | 2              | 2     | 2     | 1                                                              | 5            | 0       | 10                                      | 0    | 0           | 0.96                                                 | 5.3                                  |
| 6   | 55                 | 9                                                       | 3              | 4     | 2     | 3                                                              | 6            | 0       | 10                                      | 0    | 0           | 0.98                                                 | 4.0                                  |
| 7   | 60                 | 6                                                       | 2              | 2     | 2     | 1                                                              | 5            | 0       | 10                                      | 0    | 0           | 1.00                                                 | 1.7                                  |
| 8   | 65                 | 12                                                      | 2              | 5     | 5     | 5                                                              | 7            | 0       | 10                                      | 0    | 0           | 0.99                                                 | 3.9                                  |
| 9   | 70                 | 8                                                       | 2              | 3     | 3     | 1                                                              | 6            | 1       | 10                                      | 0    | 0           | 1.00                                                 | 2.5                                  |
| 10  | 75                 | 14                                                      | 3              | 6     | 5     | 8                                                              | 6            | 0       | 10                                      | 0    | 0           | 0.96                                                 | 6.0                                  |
| 11  | 80                 | 15                                                      | 2              | 7     | 6     | 9                                                              | 6            | 0       | 10                                      | 0    | 0           | 1.00                                                 | 5.5                                  |
| 12  | 85                 | 18                                                      | 2              | 8     | 8     | 10                                                             | 8            | 0       | 10                                      | 0    | 0           | 1.00                                                 | 7.8                                  |
| 13  | 90                 | 16                                                      | 1              | 8     | 7     | 9                                                              | 6            | 1       | 8                                       | 0    | 2           | 0.99                                                 | 4.9                                  |
| 14  | 95                 | 12                                                      | 2              | 5     | 5     | 2                                                              | 10           | 0       | 10                                      | 0    | 0           | 0.99                                                 | 2.9                                  |
| 15  | 100                | 16                                                      | 2              | 7     | 7     | 6                                                              | 10           | 0       | 10                                      | 0    | 0           | 1.00                                                 | 7.4                                  |
| 16  | 105                | 23                                                      | 5              | 9     | 9     | 11                                                             | 12           | 0       | 9                                       | 0    | 1           | 0.99                                                 | 6.9                                  |
| 17  | 110                | 16                                                      | 4              | 6     | 6     | 3                                                              | 13           | 0       | 10                                      | 0    | 0           | 1.00                                                 | 13.2                                 |
| 18  | 115                | 20                                                      | 3              | 9     | 8     | 8                                                              | 12           | 0       | 9                                       | 0    | 1           | 0.98                                                 | 9.7                                  |
| 19  | 120                | 15                                                      | 2              | 7     | 6     | 2                                                              | 12           | 1       | 10                                      | 0    | 0           | 0.98                                                 | 11.6                                 |
| 20  | 125                | 18                                                      | 3              | 8     | 7     | 6                                                              | 11           | 1       | 10                                      | 0    | 0           | 0.99                                                 | 3.6                                  |
| 21  | 130                | 15                                                      | 3              | 6     | 6     | 4                                                              | 10           | 1       | 10                                      | 0    | 0           | 1.00                                                 | 9.0                                  |
| 22  | 135                | 24                                                      | 2              | 11    | 11    | 14                                                             | 9            | 1       | 9                                       | 0    | 1           | 0.98                                                 | 6.5                                  |
| 23  | 140                | 22                                                      | 1              | 11    | 10    | 14                                                             | 7            | 1       | 8                                       | 0    | 2           | 0.98                                                 | 7.4                                  |
| 24  | 145                | 26                                                      | 0              | 13    | 13    | 16                                                             | 9            | 1       | 7                                       | 0    | 3           | 0.99                                                 | 4.5                                  |
| 25  | 150                | 28                                                      | 1              | 14    | 13    | 17                                                             | 11           | 0       | 10                                      | 0    | 0           | 1.00                                                 | 8.8                                  |
| 26  | 155                | 21                                                      | 3              | 9     | 9     | 6                                                              | 15           | 0       | 10                                      | 0    | 0           | 0.99                                                 | 7.1                                  |
| 27  | 160                | 22                                                      | 2              | 10    | 10    | 5                                                              | 16           | 1       | 6                                       | 0    | 4           | 0.98                                                 | 7.0                                  |
| 28  | 165                | 27                                                      | 3              | 12    | 12    | 11                                                             | 16           | 0       | 10                                      | 0    | 0           | 1.00                                                 | 6.8                                  |
| 29  | 170                | 28                                                      | 2              | 14    | 12    | 11                                                             | 17           | 0       | 9                                       | 0    | 1           | 0.98                                                 | 10.5                                 |
| 30  | 175                | 26                                                      | 2              | 12    | 12    | 12                                                             | 12           | 2       | 10                                      | 0    | 0           | 1.00                                                 | 17.1                                 |
| 31  | 180                | 29                                                      | 1              | 14    | 14    | 14                                                             | 13           | 2       | 10                                      | 0    | 0           | 1.00                                                 | 9.5                                  |
| 32  | 185                | 28                                                      | 3              | 13    | 12    | 7                                                              | 21           | 0       | 8                                       | 0    | 2           | 0.98                                                 | 19.4                                 |
| 33  | 190                | 24                                                      | 1              | 12    | 11    | 8                                                              | 15           | 1       | 7                                       | 1    | 2           | 0.98                                                 | 12.7                                 |
| 34  | 195                | 24                                                      | 2              | 11    | 11    | 10                                                             | 12           | 2       | 9                                       | 0    | 1           | 0.99                                                 | 7.3                                  |
| 35  | 200                | 31                                                      | 3              | 14    | 14    | 13                                                             | 18           | 0       | 8                                       | 0    | 2           | 0.99                                                 | 13.1                                 |
| 36  | 205                | 31                                                      | 2              | 15    | 14    | 11                                                             | 18           | 2       | 9                                       | 1    | 0           | 0.98                                                 | 4.9                                  |
| 37  | 210                | 39                                                      | 2              | 19    | 18    | 22                                                             | 16           | 1       | 9                                       | 0    | 1           | 0.99                                                 | 8.2                                  |
| 38  | 215                | 32                                                      | 3              | 15    | 14    | 16                                                             | 15           | 1       | 9                                       | 0    | 1           | 0.98                                                 | 18.3                                 |
| 39  | 220                | 36                                                      | 4              | 17    | 15    | 10                                                             | 26           | 0       | 5                                       | 2    | 3           | 0.96                                                 | 11.0                                 |
| 40  | 225                | 35                                                      | 1              | 17    | 17    | 12                                                             | 21           | 2       | 10                                      | 0    | 0           | 0.99                                                 | 11.1                                 |
| 41  | 230                | 36                                                      | 4              | 16    | 16    | 11                                                             | 24           | 1       | 9                                       | 0    | 1           | 0.99                                                 | 8.1                                  |
| 42  | 235                | 33                                                      | 3              | 15    | 15    | 10                                                             | 21           | 2       | 7                                       | 0    | 3           | 0.99                                                 | 20.1                                 |
| 43  | 240                | 36                                                      | 3              | 17    | 16    | 13                                                             | 23           | 0       | 10                                      | 0    | 0           | 0.99                                                 | 8.6                                  |
| 44  | 245                | 40                                                      | 1              | 20    | 19    | 22                                                             | 17           | 1       | 9                                       | 1    | 0           | 1.00                                                 | 8.2                                  |
| 45  | 250                | 41                                                      | 2              | 21    | 18    | 18                                                             | 22           | 1       | 6                                       | 0    | 4           | 0.96                                                 | 12.2                                 |
| 46  | 255                | 38                                                      | 3              | 18    | 17    | 13                                                             | 24           | 1       | 9                                       | 1    | 0           | 1.00                                                 | 8.4                                  |
| 47  | 260                | 41                                                      | 2              | 20    | 19    | 14                                                             | 24           | 3       | 7                                       | 1    | 2           | 0.99                                                 | 8.3                                  |
| 48  | 265                | 50                                                      | 3              | 25    | 22    | 25                                                             | 25           | 0       | 9                                       | 0    | 1           | 0.99                                                 | 11.6                                 |
| 49  | 270                | 35                                                      | 1              | 18    | 16    | 9                                                              | 24           | 2       | 9                                       | 0    | 1           | 1.00                                                 | 8.5                                  |
| 50  | 275                | 37                                                      | 2              | 18    | 17    | 8                                                              | 28           | 1       | 9                                       | 1    | 0           | 0.99                                                 | 17.8                                 |
| 51  | 280                | 33                                                      | 1              | 16    | 16    | 12                                                             | 18           | 3       | 6                                       | 1    | 3           | 0.99                                                 | 18.3                                 |
| 52  | 285                | 48                                                      | 4              | 22    | 22    | 24                                                             | 23           | 1       | 6                                       | 3    | 1           | 0.99                                                 | 10.5                                 |
| 53  | 290                | 43                                                      | 3              | 21    | 19    | 15                                                             | 25           | 3       | 9                                       | 0    | 1           | 0.99                                                 | 10.5                                 |
| 54  | 295                | 41                                                      | 2              | 20    | 19    | 9                                                              | 30           | 2       | 4                                       | 3    | 3           | 0.98                                                 | 10.7                                 |
| 55  | 300                | 39                                                      | 1              | 20    | 18    | 10                                                             | 25           | 4       | 9                                       | 0    | 1           | 0.99                                                 | 6.5                                  |
| 56  | 305                | 49                                                      | 5              | 23    | 21    | 20                                                             | 27           | 2       | 8                                       | 0    | 2           | 0.98                                                 | 15.2                                 |
| 57  | 310                | 39                                                      | 2              | 19    | 18    | 13                                                             | 24           | 2       | 9                                       | 0    | 1           | 0.99                                                 | 15.1                                 |
| 58  | 315                | 47                                                      | 1              | 23    | 23    | 19                                                             | 25           | 3       | 8                                       | 1    | 1           | 0.99                                                 | 9.2                                  |
| 59  | 320                | 46                                                      | 2              | 23    | 21    | 20                                                             | 24           | 2       | 10                                      | 0    | 0           | 0.99                                                 | 10.3                                 |
| 60  | 325                | 46                                                      | 2              | 22    | 22    | 19                                                             | 26           | 1       | 7                                       | 0    | 3           | 0.98                                                 | 8.4                                  |
| 61  | 330                | 52                                                      | 3              | 26    | 23    | 26                                                             | 23           | 3       | 6                                       | 1    | 3           | 0.99                                                 | 15.8                                 |
| 62  | 335                | 45                                                      | 2              | 22    | 21    | 15                                                             | 27           | 3       | 8                                       | 1    | 1           | 1.00                                                 | 22.1                                 |

|     |     |    |   |    |    |    |    |   |     |    |     |      |      |
|-----|-----|----|---|----|----|----|----|---|-----|----|-----|------|------|
| 63  | 340 | 48 | 3 | 23 | 22 | 16 | 30 | 2 | 9   | 1  | 0   | 0.99 | 9.7  |
| 64  | 345 | 53 | 2 | 27 | 24 | 15 | 35 | 3 | 9   | 1  | 0   | 0.98 | 17.6 |
| 65  | 350 | 50 | 1 | 25 | 24 | 20 | 29 | 1 | 8   | 0  | 2   | 0.99 | 25.0 |
| 66  | 355 | 56 | 2 | 28 | 26 | 20 | 36 | 0 | 3   | 1  | 6   | 0.97 | 15.0 |
| 67  | 360 | 45 | 1 | 23 | 21 | 15 | 28 | 2 | 10  | 0  | 0   | 0.99 | 10.1 |
| 68  | 365 | 53 | 3 | 26 | 24 | 16 | 35 | 2 | 9   | 0  | 1   | 0.99 | 11.9 |
| 69  | 370 | 53 | 4 | 26 | 23 | 18 | 34 | 1 | 6   | 0  | 4   | 0.99 | 13.5 |
| 70  | 375 | 52 | 3 | 26 | 23 | 17 | 31 | 4 | 9   | 1  | 0   | 1.00 | 17.3 |
| 71  | 380 | 55 | 3 | 26 | 26 | 19 | 32 | 4 | 9   | 1  | 0   | 0.99 | 19.3 |
| 72  | 385 | 59 | 2 | 31 | 26 | 20 | 39 | 0 | 8   | 1  | 1   | 0.98 | 12.7 |
| 73  | 390 | 63 | 2 | 32 | 29 | 31 | 31 | 1 | 7   | 0  | 3   | 0.98 | 11.7 |
| 74  | 395 | 54 | 2 | 28 | 24 | 23 | 29 | 2 | 5   | 3  | 2   | 0.99 | 13.6 |
| 75  | 400 | 52 | 3 | 25 | 24 | 19 | 30 | 3 | 3   | 4  | 3   | 0.98 | 13.1 |
| 76  | 405 | 55 | 3 | 27 | 25 | 19 | 33 | 3 | 10  | 0  | 0   | 1.00 | 18.7 |
| 77  | 410 | 55 | 2 | 27 | 26 | 14 | 40 | 1 | 7   | 2  | 1   | 0.97 | 16.2 |
| 78  | 415 | 65 | 2 | 32 | 31 | 24 | 40 | 1 | 3   | 5  | 2   | 0.98 | 13.5 |
| 79  | 420 | 71 | 1 | 38 | 32 | 34 | 36 | 1 | 8   | 0  | 2   | 0.98 | 14.7 |
| 80  | 425 | 52 | 2 | 26 | 24 | 14 | 34 | 4 | 4   | 1  | 5   | 0.98 | 18.5 |
| 81  | 430 | 57 | 4 | 27 | 26 | 16 | 38 | 3 | 3   | 5  | 2   | 0.98 | 12.5 |
| 82  | 435 | 69 | 3 | 35 | 31 | 29 | 37 | 3 | 8   | 0  | 2   | 0.99 | 11.6 |
| 83  | 440 | 72 | 5 | 34 | 33 | 27 | 42 | 3 | 4   | 3  | 3   | 0.98 | 17.8 |
| 84  | 445 | 52 | 2 | 25 | 25 | 16 | 32 | 4 | 5   | 2  | 3   | 0.98 | 14.6 |
| 85  | 450 | 67 | 1 | 35 | 31 | 32 | 34 | 1 | 7   | 1  | 2   | 0.98 | 11.1 |
| 86  | 455 | 68 | 3 | 33 | 32 | 28 | 36 | 4 | 6   | 3  | 1   | 0.98 | 17.5 |
| 87  | 460 | 62 | 2 | 31 | 29 | 23 | 35 | 4 | 5   | 4  | 1   | 0.99 | 11.9 |
| 88  | 465 | 59 | 3 | 28 | 28 | 18 | 37 | 4 | 3   | 3  | 4   | 0.98 | 22.4 |
| 89  | 470 | 59 | 3 | 29 | 27 | 19 | 35 | 5 | 3   | 4  | 3   | 0.99 | 16.1 |
| 90  | 475 | 61 | 3 | 29 | 29 | 26 | 31 | 4 | 8   | 1  | 1   | 0.99 | 21.0 |
| 91  | 480 | 74 | 2 | 37 | 35 | 33 | 37 | 4 | 3   | 2  | 5   | 0.96 | 29.1 |
| 92  | 485 | 71 | 4 | 35 | 32 | 31 | 36 | 4 | 8   | 1  | 1   | 0.99 | 27.2 |
| 93  | 490 | 75 | 4 | 38 | 33 | 32 | 40 | 3 | 2   | 4  | 4   | 0.97 | 21.1 |
| 94  | 495 | 74 | 3 | 39 | 32 | 31 | 40 | 3 | 2   | 6  | 2   | 0.97 | 25.2 |
| 95  | 500 | 70 | 2 | 34 | 34 | 24 | 41 | 5 | 4   | 4  | 2   | 0.98 | 27.9 |
| sum |     |    |   |    |    |    |    |   | 741 | 82 | 127 |      |      |

<sup>a)</sup> Average of Matthews correlation coefficient (41) between the input and recovered secondary structures derived from the 10 final 3D models.

<sup>b)</sup> Average heavy-atom r.m.s.d. between the 10 final RNA 3D models and their mean coordinates structure.

**Table S4.** 3D structure prediction details for the 500-mer RNA with randomized sequence

| No.                   | Size [nt] | Target secondary structure element |      |                     |          | Source tertiary structure element |          |                     |           | Selection criteria                         |                                       |                                                       |                                 |                   |          |
|-----------------------|-----------|------------------------------------|------|---------------------|----------|-----------------------------------|----------|---------------------|-----------|--------------------------------------------|---------------------------------------|-------------------------------------------------------|---------------------------------|-------------------|----------|
|                       |           | localization                       |      | secondary structure |          | localization                      |          | secondary structure |           | secondary structure topology <sup>a)</sup> | sequence similarity [%] <sup>b)</sup> | pyrimidines / purines compatibility [%] <sup>c)</sup> | source structure resolution [Å] | energy [kcal/mol] |          |
|                       |           | residues                           |      |                     |          | PDB ID                            | residues |                     |           |                                            |                                       |                                                       |                                 |                   |          |
|                       |           | first                              | last | sequence            | topology |                                   | first    | last                | sequence  |                                            |                                       |                                                       |                                 |                   | topology |
| <b>Single strands</b> |           |                                    |      |                     |          |                                   |          |                     |           |                                            |                                       |                                                       |                                 |                   |          |
| 0                     | 5         | 1                                  | 5    | GUACU               | ....(    | 3I21 A                            | 1        | 5                   | UGAAG     | ....(                                      | identical                             | 20.0                                                  | 20.0                            | 3.7               | -30.4    |
|                       | 6         | 495                                | 500  | AUUCAU              | ).....   | 1F7U B                            | 71       | 76                  | AAGCCA    | ).....                                     | identical                             | 33.3                                                  | 33.3                            | 2.2               | -47.6    |
| <b>Loops</b>          |           |                                    |      |                     |          |                                   |          |                     |           |                                            |                                       |                                                       |                                 |                   |          |
| 1                     | 5         | 6                                  | 7    | GA                  | ((       | 3I55 0                            | 2279     | 2280                | GA        | ((                                         | identical                             | 100.0                                                 | 100.0                           | 3.1               | -17.7    |
|                       |           | 492                                | 494  | UAC                 | ))       |                                   | 2290     | 2292                | UAC       | ))                                         |                                       |                                                       |                                 |                   |          |
| 2                     | 12        | 11                                 | 19   | GACUAAUCU           | (.....(  | 1AUD B                            | 18       | 26                  | CAUUGCACC | (.....(                                    | identical                             | 33.3                                                  | 58.3                            | - <sup>d)</sup>   | -157.6   |
|                       |           | 486                                | 488  | GCC                 | ))       |                                   | 5        | 7                   | GAG       | ))                                         |                                       |                                                       |                                 |                   |          |
| 3                     | 6         | 23                                 | 25   | UAA                 | ((       | 1JZX A                            | 1680     | 1682                | UAA       | ((                                         | identical                             | 100.0                                                 | 100.0                           | 3.1               | -29.6    |
|                       |           | 480                                | 482  | UCA                 | ))       |                                   | 1978     | 1980                | UCA       | ))                                         |                                       |                                                       |                                 |                   |          |
| 4                     | 5         | 27                                 | 29   | GUC                 | ((       | 1F7H A                            | 5        | 7                   | GUC       | ((                                         | identical                             | 100.0                                                 | 100.0                           | - <sup>d)</sup>   | -128.3   |
|                       |           | 477                                | 478  | GC                  | ))       |                                   | 22       | 23                  | GC        | ))                                         |                                       |                                                       |                                 |                   |          |
| 5                     | 9         | 32                                 | 37   | CGAAGC              | (....(   | 3E5C A                            | 27       | 32                  | AGAUGC    | (....(                                     | identical                             | 66.7                                                  | 66.7                            | 2.2               | -119.5   |
|                       |           | 472                                | 474  | GAG                 | ))       |                                   | 12       | 14                  | GAU       | ))                                         |                                       |                                                       |                                 |                   |          |
| 6                     | 5         | 41                                 | 42   | CC                  | ((       | 2ZJR X                            | 863      | 864                 | CC        | ((                                         | identical                             | 100.0                                                 | 100.0                           | 2.9               | -75.9    |
|                       |           | 466                                | 468  | GCG                 | ))       |                                   | 938      | 940                 | GCG       | ))                                         |                                       |                                                       |                                 |                   |          |
| 7                     | 8         | 47                                 | 48   | CC                  | ((       | 1C2W B                            | 2512     | 2513                | CA        | ((                                         | identical                             | 50.0                                                  | 75.0                            | 7.5               | -105.2   |
|                       |           | 456                                | 461  | GAUACG              | ))....)  |                                   | 2571     | 2576                | UACGCG    | ))....)                                    |                                       |                                                       |                                 |                   |          |
| 8                     | 12        | 55                                 | 58   | UACU                | ((       | 1NWX 0                            | 2489     | 2492                | CUCG      | ((                                         | identical                             | 33.3                                                  | 75.0                            | 3.5               | -174.1   |
|                       |           | 442                                | 449  | AACGUAGA            | )).....) |                                   | 2550     | 2557                | CACGCGAG  | )).....)                                   |                                       |                                                       |                                 |                   |          |
| 9                     | 6         | 60                                 | 62   | UCU                 | ((       | 2GY9 A                            | 80       | 82                  | UCU       | ((                                         | identical                             | 83.3                                                  | 100.0                           | 15.0              | -96.7    |
|                       |           | 438                                | 440  | AAA                 | ))       |                                   | 72       | 74                  | AGA       | ))                                         |                                       |                                                       |                                 |                   |          |
| 10                    | 21        | 66                                 | 81   | ACAUUAUGUAAACAG     | (.....(  | missing in dictionary             |          |                     |           | tertiary structure element is generated    |                                       |                                                       |                                 |                   |          |
|                       |           | 127                                | 129  | CAA                 | ))       |                                   |          |                     |           |                                            |                                       |                                                       |                                 |                   |          |
|                       |           | 433                                | 434  | UU                  | ))       |                                   |          |                     |           |                                            |                                       |                                                       |                                 |                   |          |
| 11                    | 14        | 84                                 | 90   | AAAAAAG             | (.....(  | 2AAR 0                            | 2540     | 2546                | AUUAAAG   | (.....(                                    | identical                             | 64.3                                                  | 71.4                            | 3.5               | -113.0   |
|                       |           | 97                                 | 100  | CCAC                | ))       |                                   | 2496     | 2499                | CAUC      | ))                                         |                                       |                                                       |                                 |                   |          |
|                       |           | 122                                | 124  | GCU                 | ))       |                                   | 2524     | 2526                | GUU       | ))                                         |                                       |                                                       |                                 |                   |          |
| 12                    | 6         | 91                                 | 96   | GUCGUC              | (....)   | 3JYX 5                            | 1022     | 1027                | GUCUUC    | (....)                                     | identical                             | 83.3                                                  | 83.3                            | 8.9               | -110.4   |
| 13                    | 7         | 108                                | 114  | UCUCUUG             | (.....)  | 2GYB A                            | 803      | 809                 | UGUCUCG   | (.....)                                    | identical                             | 71.4                                                  | 85.7                            | 15.0              | -90.6    |
| 14                    | 9         | 134                                | 135  | CG                  | ((       | 1NTB B                            | 35       | 36                  | CG        | ((                                         | identical                             | 77.8                                                  | 77.8                            | 2.9               | -146.1   |
|                       |           | 422                                | 428  | CCUUUCG             | )).....) |                                   | 7        | 13                  | CAUUUGG   | )).....)                                   |                                       |                                                       |                                 |                   |          |
| 15                    | 5         | 137                                | 139  | CAC                 | ((       | 1YL4 A                            | 1242     | 1244                | CAC       | ((                                         | identical                             | 100.0                                                 | 100.0                           | 5.5               | -91.0    |
|                       |           | 419                                | 420  | GG                  | ))       |                                   | 1255     | 1256                | GG        | ))                                         |                                       |                                                       |                                 |                   |          |
| 16                    | 6         | 143                                | 144  | AU                  | ((       | 1R2P A                            | 8        | 9                   | AU        | ((                                         | identical                             | 83.3                                                  | 100.0                           | - <sup>d)</sup>   | -70.2    |

|              |    |     |     |               |         |                       |      |      |            |                                         |           |       |       |                 |        |
|--------------|----|-----|-----|---------------|---------|-----------------------|------|------|------------|-----------------------------------------|-----------|-------|-------|-----------------|--------|
| 17           | 9  | 412 | 415 | AUGU          | )..)    | 24                    | 27   | ACGU | )..)       | identical                               | 44.4      | 66.7  | 3.1   | -55.7           |        |
|              |    | 146 | 147 | GG            | ((      | 2UUC A                | 738  | 739  | CG         | ((                                      |           |       |       |                 |        |
|              |    | 154 | 156 | CAG           | ).(     |                       | 570  | 572  | CGG        | ).(                                     |           |       |       |                 |        |
|              |    | 407 | 410 | UAAC          | )..)    |                       | 635  | 638  | CUAG       | )..)                                    |           |       |       |                 |        |
| 18           | 6  | 148 | 153 | UUUAAG        | (....)  | 3CMA 0                | 732  | 737  | UUCAAG     | (....)                                  | identical | 83.3  | 100.0 | 2.8             | -54.6  |
| 19           | 19 | 163 | 164 | GG            | ((      | missing in dictionary |      |      |            | tertiary structure element is generated |           |       |       |                 |        |
|              |    | 307 | 310 | CAGU          | )..(    |                       |      |      |            |                                         |           |       |       |                 |        |
|              |    | 388 | 400 | AAAAACGGCAAGC | ).....) |                       |      |      |            |                                         |           |       |       |                 |        |
| 20           | 6  | 170 | 172 | GCG           | .(      | 1U9S A                | 103  | 105  | GCG        | .(                                      | identical | 100.0 | 100.0 | 2.9             | -63.8  |
|              |    | 299 | 301 | CAC           | )..)    |                       | 117  | 119  | CAC        | )..)                                    |           |       |       |                 |        |
| 21           | 19 | 173 | 177 | CGGCU         | (...(   | missing in dictionary |      |      |            | tertiary structure element is generated |           |       |       |                 |        |
|              |    | 191 | 195 | ACUGA         | )..(    |                       |      |      |            |                                         |           |       |       |                 |        |
|              |    | 290 | 298 | UAUAUUAAG     | ).....) |                       |      |      |            |                                         |           |       |       |                 |        |
| 22           | 7  | 181 | 187 | CCGUCUG       | (.....) | 3JYX 5                | 400  | 406  | CCUUCGG    | (.....)                                 | identical | 71.4  | 71.4  | 8.9             | -77.1  |
| 23           | 8  | 198 | 201 | UCUU          | (.(     | 3I8G 1                | 1755 | 1758 | UUUU       | (.(                                     | identical | 87.5  | 100.0 | 3.1             | -54.4  |
|              |    | 284 | 287 | AUCA          | )..)    |                       | 1505 | 1508 | AUCA       | )..)                                    |           |       |       |                 |        |
| 24           | 14 | 205 | 206 | CG            | ((      | missing in dictionary |      |      |            | tertiary structure element is generated |           |       |       |                 |        |
|              |    | 269 | 280 | UCCACCCAAAGG  | ).....) |                       |      |      |            |                                         |           |       |       |                 |        |
| 25           | 12 | 210 | 215 | CAUUUU        | (....(  | 2WR Q                 | 1285 | 1290 | CGGAUU     | (....(                                  | identical | 50.0  | 58.3  | 3.6             | -4.3   |
|              |    | 260 | 265 | AUCCCG        | )....)  | 2WR A                 | 1311 | 1316 | AUGAAG     | )....)                                  |           |       |       |                 |        |
| 26           | 10 | 220 | 225 | GGUCGU        | (....(  | 2OGO 0                | 1503 | 1508 | GGUCAG     | (....(                                  | identical | 60.0  | 70.0  | 3.7             | -94.3  |
|              |    | 252 | 255 | AAAC          | )..)    |                       | 1514 | 1517 | CUAC       | )..)                                    |           |       |       |                 |        |
| 27           | 5  | 227 | 229 | ACG           | .(      | 1BVJ A                | 5    | 7    | ACG        | .(                                      | identical | 100.0 | 100.0 | - <sup>d)</sup> | -72.0  |
|              |    | 249 | 250 | CU            | )       |                       | 18   | 19   | CU         | )                                       |           |       |       |                 |        |
| 28           | 9  | 231 | 237 | UUCUCUG       | (.....( | 1NTA A                | 7    | 13   | CAUUUGG    | (.....(                                 | identical | 33.3  | 77.8  | 2.9             | -155.0 |
|              |    | 246 | 247 | CA            | )       | 1NTA B                | 35   | 36   | CG         | )                                       |           |       |       |                 |        |
| 29           | 6  | 239 | 244 | GCACAC        | (....)  | 2WH4 A                | 681  | 686  | GCACGC     | (....)                                  | identical | 83.3  | 100.0 | 3.5             | -47.8  |
| 30           | 22 | 313 | 325 | GAACCUAAAUAAG | (.....( | missing in dictionary |      |      |            | tertiary structure element is generated |           |       |       |                 |        |
|              |    | 364 | 365 | CC            | )       |                       |      |      |            |                                         |           |       |       |                 |        |
|              |    | 379 | 385 | GAAACCC       | ).....) |                       |      |      |            |                                         |           |       |       |                 |        |
| 31           | 6  | 328 | 330 | UAA           | .(      | 2QBA B                | 2446 | 2448 | CAA        | .(                                      | identical | 83.3  | 100.0 | 3.5             | -43.9  |
|              |    | 359 | 361 | UAG           | )..)    |                       | 2507 | 2509 | UAG        | )..)                                    |           |       |       |                 |        |
| 32           | 16 | 332 | 339 | AGUUCUAC      | (.....( | 2VHP A                | 673  | 680  | AGAAUUC    | (.....(                                 | identical | 56.2  | 68.8  | 3.7             | -151.5 |
|              |    | 350 | 357 | GGCACA AU     | ).....) |                       | 710  | 717  | GGAGGA AU  | ).....)                                 |           |       |       |                 |        |
| 33           | 10 | 340 | 349 | CGAGACUAAG    | (.....) | 1P9X 0                | 2383 | 2392 | CGUGUGGAAG | (.....)                                 | identical | 60.0  | 60.0  | 3.4             | -99.2  |
| 34           | 7  | 369 | 375 | GUAGCGC       | (.....) | 1U9S A                | 10   | 16   | GUAACGC    | (.....)                                 | identical | 85.7  | 100.0 | 2.9             | -58.3  |
| <b>Stems</b> |    |     |     |               |         |                       |      |      |            |                                         |           |       |       |                 |        |
| 1            | 4  | 5   | 6   | UG            | ((      | 3MS0 A                | 894  | 895  | UG         | ((                                      | identical | 100.0 | 100.0 | 3.6             | -38.4  |
|              |    | 494 | 495 | CA            | )       |                       | 1373 | 1374 | CA         | )                                       |           |       |       |                 |        |
| 2            | 10 | 7   | 11  | AGCGG         | (((((   | 2VHM B                | 1396 | 1400 | AGCGG      | (((((                                   | identical | 100.0 | 100.0 | 3.7             | -206.3 |
|              |    | 488 | 492 | CCGCU         | ))))    |                       | 1410 | 1414 | CCGCU      | ))))                                    |           |       |       |                 |        |
| 3            | 10 | 19  | 23  | UGUAU         | (((((   | 3CF5 X                | 835  | 839  | UGUAU      | (((((                                   | identical | 80.0  | 100.0 | 3.3             | -178.4 |
|              |    | 482 | 486 | AUACG         | ))))    |                       | 844  | 848  | GUACA      | ))))                                    |           |       |       |                 |        |
| 4            | 6  | 25  | 27  | AUG           | ((      | 1VOZ A                | 595  | 597  | AUG        | ((                                      | identical | 100.0 | 100.0 | 11.5            | -93.9  |
|              |    | 478 | 480 | CGU           | )       |                       | 627  | 629  | CGU        | )                                       |           |       |       |                 |        |
| 5            | 8  | 29  | 32  | CGAC          | (((((   | 1J5A A                | 1178 | 1181 | CAAC       | (((((                                   | identical | 87.5  | 100.0 | 3.5             | -144.3 |
|              |    | 474 | 477 | GUUG          | ))))    |                       | 1193 | 1196 | GUUG       | ))))                                    |           |       |       |                 |        |

|    |    |                                        |                 |        |                                            |                 |           |       |       |                 |        |
|----|----|----------------------------------------|-----------------|--------|--------------------------------------------|-----------------|-----------|-------|-------|-----------------|--------|
| 6  | 10 | 37 41 CCGGC<br>468 472 GCCGG           | (((<br>))))     | 1P9X 0 | 589 593 CCGGC<br>1269 1273 GCCGG           | (((<br>))))     | identical | 100.0 | 100.0 | 3.4             | -104.8 |
| 7  | 12 | 42 47 CUUCGC<br>461 466 GCGAAG         | (((<br>))))     | 1QVF 0 | 930 935 CUCCGC<br>1033 1038 GCGGGG         | (((<br>))))     | identical | 75.0  | 100.0 | 3.1             | -111.2 |
| 8  | 16 | 48 55 CGUUAACU<br>449 456 AGUUAACG     | (((((<br>)))))) | 3E1B B | 268 275 CAUUAACU<br>285 292 GGUUA AUG      | (((((<br>)))))) | identical | 81.2  | 100.0 | 9.0             | -227.7 |
| 9  | 6  | 58 60 UCU<br>440 442 AGA               | ((<br>))        | 2FRL A | 7 9 UCU<br>15 17 AGA                       | ((<br>))        | identical | 100.0 | 100.0 | - <sup>d)</sup> | -100.0 |
| 10 | 10 | 62 66 UCAUA<br>434 438 UGUGA           | (((<br>))))     | 2OGO 0 | 2827 2831 GCAUA<br>2836 2840 UGUGU         | (((<br>))))     | identical | 80.0  | 80.0  | 3.7             | -12.8  |
| 11 | 8  | 81 84 GGAA<br>124 127 UUCC             | (((<br>))))     | 1W2B 0 | 1408 1411 GGAU<br>1696 1699 GUCC           | (((<br>))))     | identical | 75.0  | 75.0  | 3.5             | -118.2 |
| 12 | 4  | 90 91 GG<br>96 97 CC                   | ((<br>))        | 3BBX B | 1593 1594 GG<br>1600 1601 CC               | ((<br>))        | identical | 100.0 | 100.0 | 10.0            | -69.9  |
| 13 | 18 | 100 108 CUGAGUGCU<br>114 122 GGUUAUCAG | (((((<br>)))))) | 1YJ9 0 | 2381 2389 CAGUGUUCU<br>2399 2407 GGAACGCUG | (((((<br>)))))) | identical | 61.1  | 66.7  | 2.9             | -340.3 |
| 14 | 12 | 129 134 AGUGGC<br>428 433 GCCAUU       | (((<br>))))     | 3CUL C | 2 7 GAUGGC<br>12 17 GCCAUU                 | (((<br>))))     | identical | 83.3  | 100.0 | 2.8             | -93.7  |
| 15 | 6  | 135 137 GGC<br>420 422 GCC             | ((<br>))        | 1HNX A | 489 491 GGC<br>508 510 GCC                 | ((<br>))        | identical | 100.0 | 100.0 | 3.4             | -117.6 |
| 16 | 10 | 139 143 CCGUA<br>415 419 UACGG         | (((<br>))))     | 1JGQ D | 178 182 CCGGA<br>190 194 UCCGG             | (((<br>))))     | identical | 80.0  | 80.0  | 5.0             | -188.5 |
| 17 | 6  | 144 146 UCG<br>410 412 CGA             | (((<br>))))     | 3EPJ F | 71 73 UCG<br>135 137 CGA                   | (((<br>))))     | identical | 100.0 | 100.0 | 3.1             | -58.3  |
| 18 | 4  | 147 148 GU<br>153 154 GC               | ((<br>))        | 1PNY 0 | 1865 1866 GU<br>1871 1872 GC               | ((<br>))        | identical | 100.0 | 100.0 | 9.5             | -97.6  |
| 19 | 16 | 156 163 GAUAGACG<br>400 407 CGUCUAUU   | (((((<br>)))))) | 1VS6 B | 1284 1291 CAGCGACG<br>1298 1305 CGUUGUUG   | (((((<br>)))))) | identical | 56.2  | 62.5  | 3.5             | -270.5 |
| 20 | 14 | 164 170 GAAGGAG<br>301 307 CUCCUUC     | (((<br>))))     | 3JYV A | 1432 1438 GACGGAG<br>1485 1491 CUCCGUC     | (((<br>))))     | identical | 85.7  | 85.7  | 8.9             | -298.8 |
| 21 | 4  | 172 173 GC<br>298 299 GC               | ((<br>))        | 3D5B A | 1116 1117 GC<br>1124 1125 GC               | ((<br>))        | identical | 100.0 | 100.0 | 3.2             | -103.0 |
| 22 | 10 | 177 181 UGCGC<br>187 191 GCGUA         | (((<br>))))     | 2HEM A | 6 10 GCGCG<br>15 19 GCGUC                  | (((<br>))))     | identical | 80.0  | 80.0  | - <sup>d)</sup> | -259.9 |
| 23 | 8  | 195 198 AUAU<br>287 290 AUGU           | (((<br>))))     | 2BYT E | 110 113 GCAU<br>125 128 AUGU               | (((<br>))))     | identical | 75.0  | 100.0 | 3.3             | -104.9 |
| 24 | 10 | 201 205 UCUC<br>280 284 GGAGA          | (((<br>))))     | 1YL3 A | 2595 2599 UCUC<br>2621 2625 GGAGG          | (((<br>))))     | identical | 90.0  | 100.0 | 5.5             | -160.3 |
| 25 | 10 | 206 210 GGAGC<br>265 269 GCUCU         | (((<br>))))     | 3BBO A | 2647 2651 AGAGC<br>2802 2806 GCUCU         | (((<br>))))     | identical | 90.0  | 100.0 | 9.4             | -183.4 |
| 26 | 12 | 215 220 UGUAGG<br>255 260 CCUAUA       | (((<br>))))     | 3A3A A | 28 33 UGCAGG<br>41 46 CCUGUA               | (((<br>))))     | identical | 83.3  | 100.0 | 3.1             | -159.9 |
| 27 | 6  | 225 227 UGA<br>250 252 UCA             | ((<br>))        | 3CCU 0 | 560 562 UGA<br>595 597 UCA                 | ((<br>))        | identical | 100.0 | 100.0 | 2.8             | -69.2  |
| 28 | 6  | 229 231 GCU<br>247 249 AGC             | (((<br>))))     | 2WRR A | 325 327 GCU<br>338 340 AGC                 | (((<br>))))     | identical | 100.0 | 100.0 | 3.6             | -34.5  |
| 29 | 6  | 237 239 GAG                            | (((             | 1PNX A | 402 404 GAG                                | (((             | identical | 100.0 | 100.0 | 9.5             | -89.8  |



|    |    |     |     |       |      |        |      |      |       |      |           |       |       |     |        |
|----|----|-----|-----|-------|------|--------|------|------|-------|------|-----------|-------|-------|-----|--------|
|    |    | 244 | 246 | CUC   | )))  |        | 428  | 430  | CUC   | )))  |           |       |       |     |        |
| 30 | 8  | 310 | 313 | UCGG  | (((  | 2QBG B | 992  | 995  | UCGG  | (((  | identical | 100.0 | 100.0 | 3.3 | -96.7  |
|    |    | 385 | 388 | CCGA  | )))) |        | 1022 | 1025 | CCGA  | )))) |           |       |       |     |        |
| 31 | 8  | 325 | 328 | GUAU  | (((  | 2QAL A | 406  | 409  | GUAU  | (((  | identical | 100.0 | 100.0 | 3.2 | -69.9  |
|    |    | 361 | 364 | GUAC  | )))) |        | 433  | 436  | GUAC  | )))) |           |       |       |     |        |
| 32 | 6  | 330 | 332 | ACA   | (((  | 1JGO D | 162  | 164  | ACA   | (((  | identical | 100.0 | 100.0 | 5.6 | -108.5 |
|    |    | 357 | 359 | UGU   | )))  |        | 174  | 176  | UGU   | )))  |           |       |       |     |        |
| 33 | 4  | 339 | 340 | CC    | ((   | 3MRZ A | 1026 | 1027 | CC    | ((   | identical | 100.0 | 100.0 | 3.6 | -73.4  |
|    |    | 349 | 350 | GG    | )    |        | 1155 | 1156 | GG    | )    |           |       |       |     |        |
| 34 | 10 | 365 | 369 | CGUUG | (((  | 2QAO B | 2935 | 2939 | CGUUG | (((  | identical | 90.0  | 100.0 | 3.2 | -178.4 |
|    |    | 375 | 379 | CAACG | )))) |        | 2947 | 2951 | CGACG | )))) |           |       |       |     |        |

a) encompassing the secondary structure element size, number and length of RNA strands

b) between the target and source RNA sequence

c) shows matching of the purine / pyrimidine residues for the target and source RNA of given sequence

d) the NMR structure as a source

**Table S5.** MolProbity RNA structure stereochemical quality assessment for the 3D models predicted by RNAComposer for set of 40 benchmark structures described in the Table 1. An assessment includes respective high-resolution X-ray structures.

| PDB code and chain                         | RNA strand length [nt] | clash-score, all atoms |              | nucleic acid geometry  |             |              |              |                   |             |                    |              |
|--------------------------------------------|------------------------|------------------------|--------------|------------------------|-------------|--------------|--------------|-------------------|-------------|--------------------|--------------|
|                                            |                        |                        |              | potentially incorrect  |             |              |              | outlier bonds [%] |             | outlier angles [%] |              |
|                                            |                        | sugar puckers          |              | backbone conformations |             |              |              |                   |             |                    |              |
|                                            |                        | RNA Composer           | X-ray        | RNA Composer           | X-ray       | RNA Composer | X-ray        | RNA Composer      | X-ray       | RNA Composer       | X-ray        |
| <i>hairpin</i>                             |                        |                        |              |                        |             |              |              |                   |             |                    |              |
| 2DR8 B                                     | 33                     | 17.92                  | 33.87        | 1                      | 3           | 7            | 6            | 0.00              | 0.00        | 0.00               | 0.00         |
| 3OVA C                                     | 34                     | 16.64                  | 6.45         | 2                      | 2           | 6            | 3            | 0.00              | 0.00        | 0.00               | 17.65        |
| <i>hairpin internal loop</i>               |                        |                        |              |                        |             |              |              |                   |             |                    |              |
| 1JBR D                                     | 31                     | 16.93                  | 6.95         | 0                      | 1           | 3            | 7            | 0.00              | 6.45        | 0.00               | 3.23         |
| 2HW8 B                                     | 36                     | 12.90                  | 4.28         | 1                      | 1           | 3            | 4            | 0.00              | 0.00        | 0.00               | 11.11        |
| 1ZHO B                                     | 38                     | 12.23                  | 12.21        | 1                      | 1           | 5            | 3            | 0.00              | 2.63        | 0.00               | 13.16        |
| 3IAB R                                     | 46                     | 16.90                  | 13.50        | 2                      | 3           | 11           | 12           | 0.00              | 2.17        | 0.00               | 17.39        |
| <i>hairpin internal loops</i>              |                        |                        |              |                        |             |              |              |                   |             |                    |              |
| 116U C                                     | 37                     | 14.31                  | 9.20         | 1                      | 4           | 4            | 7            | 0.00              | 0.00        | 0.00               | 8.11         |
| 2PXL B                                     | 47                     | 15.79                  | 11.47        | 0                      | 0           | 5            | 1            | 0.00              | 0.00        | 0.00               | 0.00         |
| 2VPL B                                     | 48                     | 12.24                  | 3.22         | 2                      | 3           | 10           | 8            | 0.00              | 0.00        | 0.00               | 27.08        |
| 2PXB B                                     | 49                     | 11.46                  | 11.58        | 0                      | 0           | 5            | 2            | 0.00              | 0.00        | 0.00               | 0.00         |
| 1MZP B                                     | 55                     | 13.48                  | 14.00        | 4                      | 7           | 10           | 9            | 0.00              | 0.00        | 0.00               | 7.27         |
| 1KXX A                                     | 70                     | 19.07                  | 27.47        | 1                      | 4           | 16           | 15           | 0.00              | 0.00        | 0.00               | 1.43         |
| <i>three-way junction</i>                  |                        |                        |              |                        |             |              |              |                   |             |                    |              |
| 1DK1 B                                     | 57                     | 19.57                  | 37.28        | 3                      | 3           | 9            | 13           | 0.00              | 3.51        | 0.00               | 8.77         |
| 1MMS C                                     | 58                     | 15.56                  | 14.41        | 0                      | 0           | 7            | 3            | 0.00              | 0.00        | 0.00               | 0.00         |
| 1UN6 E                                     | 61                     | 14.23                  | 26.40        | 1                      | 0           | 9            | 6            | 0.00              | 0.00        | 0.00               | 0.00         |
| <i>three-way junction (hammerhead)</i>     |                        |                        |              |                        |             |              |              |                   |             |                    |              |
| 2QUS A                                     | 69                     | 12.63                  | 8.5          | 0                      | 5           | 11           | 19           | 0.00              | 1.47        | 0.00               | 41.18        |
| <i>three-way junction (riboswitch)</i>     |                        |                        |              |                        |             |              |              |                   |             |                    |              |
| 3LA5 A                                     | 71                     | 18.57                  | 6.13         | 1                      | 2           | 8            | 1            | 0.00              | 0.00        | 0.00               | 7.04         |
| 3D2V A                                     | 77                     | 18.51                  | 11.03        | 1                      | 1           | 11           | 10           | 0.00              | 0.00        | 0.00               | 2.60         |
| <i>three-way junction (GMP riboswitch)</i> |                        |                        |              |                        |             |              |              |                   |             |                    |              |
| 3IWN A                                     | 93                     | 7.99                   | 38.36        | 0                      | 11          | 13           | 25           | 0.00              | 0.00        | 0.00               | 10.75        |
| <i>three-way junction (SRP)</i>            |                        |                        |              |                        |             |              |              |                   |             |                    |              |
| 2V3C M                                     | 96                     | 17.70                  | 65.64        | 2                      | 16          | 19           | 52           | 0.00              | 56.25       | 0.00               | 98.96        |
| 1LNG B                                     | 97                     | 15.95                  | 41.76        | 1                      | 10          | 26           | 39           | 0.00              | 6.19        | 0.00               | 49.48        |
| 1Z43 A                                     | 101                    | 14.38                  | 76.81        | 1                      | 14          | 25           | 54           | 0.00              | 35.64       | 0.00               | 87.13        |
| 3NDB M                                     | 136                    | 13.87                  | 31.14        | 2                      | 14          | 28           | 68           | 0.00              | 8.09        | 0.00               | 74.26        |
| <i>three-way junction (5S rRNA)</i>        |                        |                        |              |                        |             |              |              |                   |             |                    |              |
| 3OFQ B                                     | 117                    | 17.48                  | 64.06        | 2                      | 16          | 24           | 44           | 0.00              | 0.00        | 0.00               | 22.22        |
| 3OFR B                                     | 118                    | 14.44                  | 33.82        | 3                      | 17          | 19           | 34           | 0.00              | 0.00        | 0.00               | 36.44        |
| 3KIR B                                     | 119                    | 15.56                  | 22.34        | 1                      | 1           | 23           | 18           | 0.00              | 0.00        | 0.00               | 0.84         |
| 3I9E B                                     | 120                    | 13.92                  | 35.83        | 0                      | 6           | 18           | 21           | 0.00              | 0.00        | 0.00               | 5.00         |
| 1VQO 9                                     | 122                    | 14.01                  | 15.01        | 1                      | 2           | 24           | 16           | 0.00              | 0.00        | 0.00               | 0.82         |
| <i>four-way junction (tRNA)</i>            |                        |                        |              |                        |             |              |              |                   |             |                    |              |
| 1EXD B                                     | 73                     | 8.10                   | 46.77        | 2                      | 12          | 16           | 19           | 0.00              | 0.00        | 0.00               | 12.33        |
| 1U0B A                                     | 74                     | 16.44                  | 22.74        | 7                      | 8           | 15           | 15           | 0.00              | 1.35        | 0.00               | 1.35         |
| 1FFY T                                     | 75                     | 19.47                  | 26.39        | 6                      | 12          | 18           | 25           | 0.00              | 0.00        | 0.00               | 5.33         |
| 2J00 W                                     | 76                     | 18.44                  | 40.92        | 2                      | 3           | 18           | 15           | 0.00              | 0.00        | 0.00               | 6.58         |
| <i>four-way junction (riboswitch)</i>      |                        |                        |              |                        |             |              |              |                   |             |                    |              |
| 3IQP A                                     | 94                     | 13.12                  | 35.29        | 5                      | 10          | 17           | 27           | 0.00              | 2.13        | 0.00               | 11.70        |
| <i>five-way junction (tRNA)</i>            |                        |                        |              |                        |             |              |              |                   |             |                    |              |
| 3AM1 B                                     | 81                     | 16.08                  | 42.46        | 4                      | 6           | 14           | 22           | 0.00              | 0.00        | 0.00               | 30.86        |
| 1WZ2 C                                     | 88                     | 13.06                  | 32.09        | 4                      | 7           | 26           | 24           | 0.00              | 0.00        | 0.00               | 6.82         |
| 3ADB C                                     | 92                     | 17.18                  | 21.20        | 1                      | 1           | 16           | 13           | 0.00              | 1.09        | 0.00               | 4.35         |
| <i>pseudoknot</i>                          |                        |                        |              |                        |             |              |              |                   |             |                    |              |
| 2QWY A                                     | 52                     | 22.67                  | 39.77        | 2                      | 3           | 13           | 15           | 0.00              | 0.00        | 0.00               | 1.92         |
| <i>pseudoknot (HDV ribozyme)</i>           |                        |                        |              |                        |             |              |              |                   |             |                    |              |
| 1CX0 B                                     | 72                     | 12.96                  | 24.09        | 3                      | 8           | 16           | 16           | 0.00              | 0.00        | 0.00               | 9.72         |
| <i>P4-P6 ribozyme domain</i>               |                        |                        |              |                        |             |              |              |                   |             |                    |              |
| 2R8S R                                     | 159                    | 12.89                  | 2.34         | 10                     | 5           | 21           | 14           | 10.06             | 0.00        | 10.06              | 8.81         |
| <i>M-box riboswitch</i>                    |                        |                        |              |                        |             |              |              |                   |             |                    |              |
| 3PDR A                                     | 161                    | 17.83                  | 8.11         | 1                      | 2           | 30           | 17           | 0.00              | 0.00        | 0.00               | 11.80        |
| <b>average</b>                             |                        | <b>15.31</b>           | <b>25.62</b> | <b>2.03</b>            | <b>5.60</b> | <b>14.47</b> | <b>18.05</b> | <b>0.25</b>       | <b>3.17</b> | <b>0.25</b>        | <b>16.59</b> |

**Table S6.** RNA 3D structure prediction details for the n-way junctions

| PDB code 2QUS; three-way junction (hammerhead)                                    |           |                                    |                                                                                    |                     |           |                                   |          |                     |                   | Input data                                                       |                                       |                                                       |                                 |                   |          |
|-----------------------------------------------------------------------------------|-----------|------------------------------------|------------------------------------------------------------------------------------|---------------------|-----------|-----------------------------------|----------|---------------------|-------------------|------------------------------------------------------------------|---------------------------------------|-------------------------------------------------------|---------------------------------|-------------------|----------|
| GGGAGCCCUGUCACCGGAUGUGCUUCCGGUCUGAUGAGUCGUGAGGACAAAACAGGGCUCCGAAUU                |           |                                    |                                                                                    |                     |           |                                   |          |                     |                   | Secondary structure derived from the RNA FRABASE                 |                                       |                                                       |                                 |                   |          |
| (((((((((((.((((.....[.]))))))).....).(((...])))).....)))))).....                 |           |                                    |                                                                                    |                     |           |                                   |          |                     |                   | Note the square bracket for <b>U24-A46</b> loop-loop interaction |                                       |                                                       |                                 |                   |          |
| 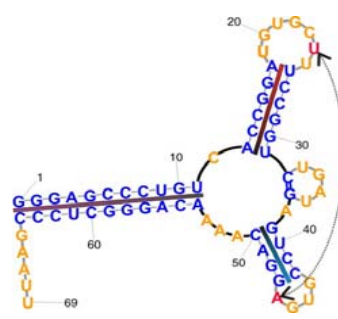 |           |                                    |  |                     |           | Model No.                         |          |                     | Energy [kcal/mol] |                                                                  | r.m.s.d. [Å]                          |                                                       |                                 |                   |          |
| Secondary structure visualization                                                 |           |                                    | 10 superimposed 3D models                                                          |                     |           | 1                                 |          | -1622               |                   | 3.7                                                              |                                       |                                                       |                                 |                   |          |
|                                                                                   |           |                                    |                                                                                    |                     |           | 2                                 |          | -1637               |                   | 3.4                                                              |                                       |                                                       |                                 |                   |          |
|                                                                                   |           |                                    |                                                                                    |                     |           | 3                                 |          | -1585               |                   | 3.8                                                              |                                       |                                                       |                                 |                   |          |
|                                                                                   |           |                                    |                                                                                    |                     |           | 4                                 |          | -1598               |                   | 3.7                                                              |                                       |                                                       |                                 |                   |          |
|                                                                                   |           |                                    |                                                                                    |                     |           | 5                                 |          | -1555               |                   | 4.3                                                              |                                       |                                                       |                                 |                   |          |
|                                                                                   |           |                                    |                                                                                    |                     |           | 6                                 |          | -1622               |                   | 3.6                                                              |                                       |                                                       |                                 |                   |          |
|                                                                                   |           |                                    |                                                                                    |                     |           | 7                                 |          | -1584               |                   | 3.8                                                              |                                       |                                                       |                                 |                   |          |
|                                                                                   |           |                                    |                                                                                    |                     |           | 8                                 |          | -1620               |                   | 4.1                                                              |                                       |                                                       |                                 |                   |          |
|                                                                                   |           |                                    |                                                                                    |                     |           | 9                                 |          | -1601               |                   | 3.8                                                              |                                       |                                                       |                                 |                   |          |
|                                                                                   |           |                                    |                                                                                    |                     |           | 10                                |          | -1580               |                   | 3.9                                                              |                                       |                                                       |                                 |                   |          |
| <b>Lowest r.m.s.d. 3D model (No. 2)</b>                                           |           |                                    |                                                                                    |                     |           |                                   |          |                     |                   |                                                                  |                                       |                                                       |                                 |                   |          |
| Details of the model No. 2 prediction <sup>a)</sup>                               |           |                                    |                                                                                    |                     |           |                                   |          |                     |                   |                                                                  |                                       |                                                       |                                 |                   |          |
| No.                                                                               | Size [nt] | Target secondary structure element |                                                                                    |                     |           | Source tertiary structure element |          |                     |                   | Selection criteria                                               |                                       |                                                       |                                 |                   |          |
|                                                                                   |           | localization                       |                                                                                    | secondary structure |           | localization                      |          | secondary structure |                   | secondary structure topology <sup>b)</sup>                       | sequence similarity [%] <sup>c)</sup> | pyrimidines / purines compatibility [%] <sup>d)</sup> | source structure resolution [Å] | energy [kcal/mol] |          |
|                                                                                   |           | residues                           |                                                                                    | sequence            | topology  | PDB ID                            | residues |                     | sequence          |                                                                  |                                       |                                                       |                                 |                   | topology |
|                                                                                   |           | first                              | last                                                                               |                     |           |                                   | first    | last                |                   |                                                                  |                                       |                                                       |                                 |                   |          |
| <b>Single strands</b>                                                             |           |                                    |                                                                                    |                     |           |                                   |          |                     |                   |                                                                  |                                       |                                                       |                                 |                   |          |
| 0                                                                                 | 6         | 64                                 | 69                                                                                 | CGAAUU              | ).....    | 2QUW D                            | 133      | 138                 | CGAAUU            | ).....                                                           | identical                             | 100.0                                                 | 100.0                           | 2.2               | -78.8    |
| <b>Loops</b>                                                                      |           |                                    |                                                                                    |                     |           |                                   |          |                     |                   |                                                                  |                                       |                                                       |                                 |                   |          |
| 1                                                                                 | 13        | 11                                 | 13                                                                                 | UCA                 | ((        | 2GOZ B                            | 48       | 50                  | UCC               | ((                                                               | identical                             | 76.9                                                  | 84.6                            | 2.2               | -267.9   |
|                                                                                   |           | 31                                 | 32                                                                                 | UC                  | )         | 2GOZ A                            | 14       | 15                  | GC                | )                                                                |                                       |                                                       |                                 |                   |          |
|                                                                                   |           | 37                                 | 39                                                                                 | GAG                 | ).        |                                   | 20       | 22                  | GAG               | ).                                                               |                                       |                                                       |                                 |                   |          |
|                                                                                   |           | 50                                 | 54                                                                                 | CAAAA               | ...)      |                                   | 35       | 39                  | CGAAA             | ...)                                                             |                                       |                                                       |                                 |                   |          |
| 2                                                                                 | 9         | 18                                 | 26                                                                                 | AUGUGCUUU           | (.....[.) | 2QUW B                            | 18       | 26                  | AUGUGCUUU         | (.....[.)                                                        | identical                             | 100.0                                                 | 100.0                           | 2.2               | -98.7    |
| 3                                                                                 | 6         | 32                                 | 37                                                                                 | CUGAUG              | (.....)   | 2GOZ A                            | 15       | 20                  | CUGAUG            | (.....)                                                          | identical                             | 100.0                                                 | 100.0                           | 2.2               | -127.2   |
| 4                                                                                 | 6         | 42                                 | 47                                                                                 | CGUGAG              | (...)     | 2QUW D                            | 111      | 116                 | CGUGAG            | (...)                                                            | identical                             | 100.0                                                 | 100.0                           | 2.2               | -87.4    |
| <b>Stems</b>                                                                      |           |                                    |                                                                                    |                     |           |                                   |          |                     |                   |                                                                  |                                       |                                                       |                                 |                   |          |
| 1                                                                                 | 22        | 1                                  | 11                                                                                 | GGGAGCCCUGU         | ((((((((  | 2HGQ A                            | 15       | 25                  | GGGCCACGGU        | ((((((((                                                         | identical                             | 54.5                                                  | 63.6                            | 5.5               | -493.5   |
|                                                                                   |           | 54                                 | 64                                                                                 | ACAGGGCUCCC         | ))))))))) |                                   | 541      | 551                 | ACCGUGGGCUU       | )))))))))                                                        |                                       |                                                       |                                 |                   |          |
| 2                                                                                 | 12        | 13                                 | 18                                                                                 | ACCGGA              | (((       | 2G5K A                            | 10       | 15                  | UCCGGA            | (((                                                              | identical                             | 83.3                                                  | 83.3                            | 2.8               | -200.6   |
|                                                                                   |           | 26                                 | 31                                                                                 | UCCGGU              | ))))      | 2G5K B                            | 33       | 38                  | UCCGGA            | ))))                                                             |                                       |                                                       |                                 |                   |          |
| 3                                                                                 | 2         | 32                                 | 32                                                                                 | C                   | (         | single base pair - not used       |          |                     |                   |                                                                  | single base pair - not used           |                                                       |                                 |                   |          |
|                                                                                   |           | 37                                 | 37                                                                                 | G                   | )         |                                   |          |                     |                   |                                                                  |                                       |                                                       |                                 |                   |          |
| 4                                                                                 | 8         | 39                                 | 42                                                                                 | GUCC                | (((       | 2GOZ A                            | 22       | 25                  | GUCC              | (((                                                              | identical                             | 100.0                                                 | 100.0                           | 2.2               | -171.5   |
|                                                                                   |           | 47                                 | 50                                                                                 | GGAC                | )))       | 2GOZ A                            | 32       | 35                  | GGAC              | )))                                                              |                                       |                                                       |                                 |                   |          |

**PDB code 2QUS; three-way junction (hammerhead)**

GGGAGCCUGUCACCGAUGUCUUCCGGUCUGAUGAGUCCGUGAGGACAAAACAGGGCUCCCGAAUU  
 ((((((((((.((((.....)))))))(.....).(((.....)))).....)))))).....

**Input data**

Secondary structure derived from the RNA FRABASE  
 A square bracket to note U24-A46 interaction was purposefully removed.

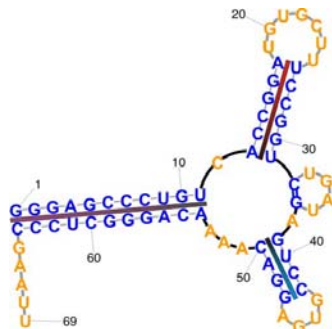

Secondary structure visualization

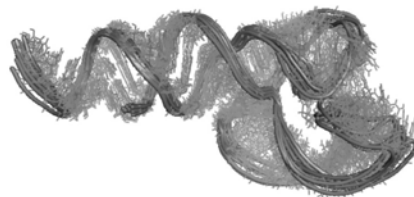

10 superimposed 3D models

| Model No. | Energy [kcal/mol] | r.m.s.d. [Å] |
|-----------|-------------------|--------------|
| 1         | -1670             | 6.4          |
| 2         | -1620             | 6.0          |
| 3         | -1646             | 6.6          |
| 4         | -1611             | 5.9          |
| 5         | -1664             | 6.0          |
| 6         | -1615             | 7.2          |
| 7         | -1647             | 5.9          |
| 8         | -1643             | 7.3          |
| 9         | -1631             | 7.0          |
| 10        | -1642             | 6.5          |

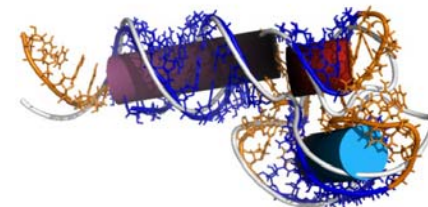

Lowest r.m.s.d. 3D model (No. 4)

**Details of the model No. 4 prediction <sup>a)</sup>**

| No.                   | Size [nt] | Target secondary structure element |      |                     |           | Source tertiary structure element |          |                     |             | Selection criteria              |                             |                                            |                                 |                   |          |
|-----------------------|-----------|------------------------------------|------|---------------------|-----------|-----------------------------------|----------|---------------------|-------------|---------------------------------|-----------------------------|--------------------------------------------|---------------------------------|-------------------|----------|
|                       |           | localization                       |      | secondary structure |           | localization                      |          | secondary structure |             | secondary structure topology b) | sequence similarity [%] c)  | pyrimidines / purines compatibility [%] d) | source structure resolution [Å] | energy [kcal/mol] |          |
|                       |           | residues                           |      | sequence            | topology  | PDB ID                            | residues |                     | sequence    |                                 |                             |                                            |                                 |                   | topology |
|                       |           | first                              | last |                     |           |                                   | first    | last                |             |                                 |                             |                                            |                                 |                   |          |
| <b>Single strands</b> |           |                                    |      |                     |           |                                   |          |                     |             |                                 |                             |                                            |                                 |                   |          |
| 0                     | 6         | 64                                 | 69   | CGAAUU              | ).....    | 2QUW D                            | 133      | 138                 | CGAAUU      | ).....                          | identical                   | 100.0                                      | 100.0                           | 2.2               | -78.8    |
| <b>Loops</b>          |           |                                    |      |                     |           |                                   |          |                     |             |                                 |                             |                                            |                                 |                   |          |
| 1                     | 13        | 11                                 | 13   | UCA                 | ((        | 2GOZ B                            | 48       | 50                  | UCC         | ((                              | identical                   | 76.9                                       | 84.6                            | 2.2               | -267.9   |
|                       |           | 31                                 | 32   | UC                  | )         | 2GOZ A                            | 14       | 15                  | GC          | )                               |                             |                                            |                                 |                   |          |
|                       |           | 37                                 | 39   | GAG                 | ).        |                                   | 20       | 22                  | GAG         | ).                              |                             |                                            |                                 |                   |          |
|                       |           | 50                                 | 54   | CAAAA               | )...)     |                                   | 35       | 39                  | CGAAA       | )...)                           |                             |                                            |                                 |                   |          |
| 2                     | 9         | 18                                 | 26   | AUGUGCUUU           | (.....)   | 3JYX 5                            | 1691     | 1699                | AUGAGAACU   | (.....)                         | identical                   | 55.6                                       | 66.7                            | 8.9               | -82.2    |
| 3                     | 6         | 32                                 | 37   | CUGAUG              | (....)    | 2QUW D                            | 101      | 106                 | CUGAUG      | (....)                          | identical                   | 100.0                                      | 100.0                           | 2.2               | -125.4   |
| 4                     | 6         | 42                                 | 47   | CGUGAG              | (....)    | 2VQF A                            | 1059     | 1064                | CGUGAG      | (....)                          | identical                   | 100.0                                      | 100.0                           | 2.9               | -51.7    |
| <b>Stems</b>          |           |                                    |      |                     |           |                                   |          |                     |             |                                 |                             |                                            |                                 |                   |          |
| 1                     | 22        | 1                                  | 11   | GGGAGCCUGU          | ((((((((  | 2HGU A                            | 15       | 25                  | GGGCCACGGU  | ((((((((                        | identical                   | 54.5                                       | 63.6                            | 4.5               | -464.9   |
|                       |           | 54                                 | 64   | ACAGGGCUCCC         | ))))))))) |                                   | 541      | 551                 | ACCGUGGGCUU | )))))))))                       |                             |                                            |                                 |                   |          |
| 2                     | 12        | 13                                 | 18   | ACCGGA              | (((       | 3ADB D                            | 120      | 125                 | GCCGGA      | (((                             | identical                   | 83.3                                       | 100.0                           | 2.8               | -230.7   |
|                       |           | 26                                 | 31   | UCCGGU              | ))))      |                                   | 133      | 138                 | UCCGGC      | ))))                            |                             |                                            |                                 |                   |          |
| 3                     | 2         | 32                                 | 32   | C                   | (         |                                   |          |                     |             |                                 | single base pair - not used |                                            |                                 |                   |          |
|                       |           | 37                                 | 37   | G                   | )         |                                   |          |                     |             |                                 |                             |                                            |                                 |                   |          |
| 4                     | 8         | 39                                 | 42   | GUCC                | (((       | 3JYX 5                            | 458      | 461                 | GUCC        | (((                             | identical                   | 100.0                                      | 100.0                           | 8.9               | -135.5   |
|                       |           | 47                                 | 50   | GGAC                | )))       |                                   | 470      | 473                 | GGAC        | )))                             |                             |                                            |                                 |                   |          |

**PDB code 3ADB; five-way-junction (tRNA)**

GGCCGCGCCACCGGGGUGGUCCCCGGGCCGGAUCUUCAGAUCCGGCGCGCCCCGAGUGGGGCGCGGGGUCAAUCCCCGCGCGCCGCCA  
 ((((((((((...(((...[.]...))))))(((.....))))))(((.....))))))(((.....))))))(((.....)))))).....

**Input data**

Secondary structure derived from the RNA FRABASE  
 Note the square bracket for **G20-C71** loop-loop interaction

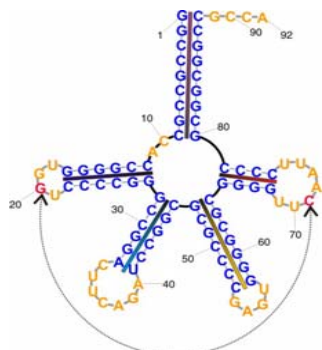

Secondary structure visualization

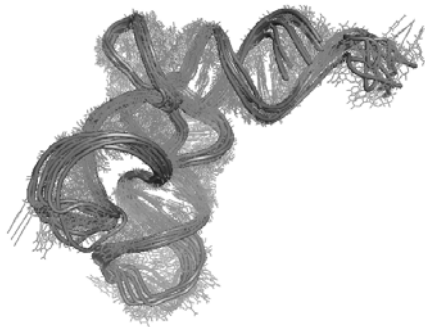

10 superimposed 3D models

| Model No. | Energy [kcal/mol] | r.m.s.d. [Å] |
|-----------|-------------------|--------------|
| 1         | -2457             | 3.9          |
| 2         | -2446             | 5.7          |
| 3         | -2349             | 6.4          |
| 4         | -2403             | 3.6          |
| 5         | -2365             | 3.6          |
| 6         | -2379             | 5.0          |
| 7         | -2434             | 4.4          |
| 8         | -2408             | 5.9          |
| 9         | -2457             | 3.6          |
| 10        | -2414             | 4.9          |

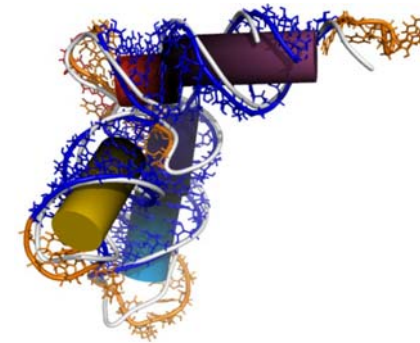

Lowest r.m.s.d. 3D model (No. 4)

**Details of the model No. 4 prediction <sup>a)</sup>**

| No.                   | Size [nt] | Target secondary structure element |      |                     |           | Source tertiary structure element |          |                     |           | Selection criteria              |                            |                                            |                                 |                   |          |
|-----------------------|-----------|------------------------------------|------|---------------------|-----------|-----------------------------------|----------|---------------------|-----------|---------------------------------|----------------------------|--------------------------------------------|---------------------------------|-------------------|----------|
|                       |           | localization                       |      | secondary structure |           | localization                      |          | secondary structure |           | secondary structure topology b) | sequence similarity [%] c) | pyrimidines / purines compatibility [%] d) | source structure resolution [Å] | energy [kcal/mol] |          |
|                       |           | residues                           |      | sequence            | topology  | PDB ID                            | residues |                     | sequence  |                                 |                            |                                            |                                 |                   | topology |
|                       |           | first                              | last |                     |           |                                   | first    | last                |           |                                 |                            |                                            |                                 |                   |          |
| <b>Single strands</b> |           |                                    |      |                     |           |                                   |          |                     |           |                                 |                            |                                            |                                 |                   |          |
| 0                     | 5         | 88                                 | 92   | CGCCA               | )....     | 3ADC D                            | 180      | 184                 | CGCCA     | )....                           | identical                  | 100.0                                      | 100.0                           | 2.9               | -47.9    |
| <b>Loops</b>          |           |                                    |      |                     |           |                                   |          |                     |           |                                 |                            |                                            |                                 |                   |          |
| 1                     | 12        | 9                                  | 12   | CCAC                | ..(       | 3ADD C                            | 9        | 12                  | CCAC      | ..(                             | identical                  | 100.0                                      | 100.0                           | 2.4               | -9.2     |
|                       |           | 27                                 | 28   | GG                  | )         |                                   | 27       | 28                  | GG        | )                               |                            |                                            |                                 |                   |          |
|                       |           | 46                                 | 47   | CG                  | )         |                                   | 46       | 47                  | CG        | )                               |                            |                                            |                                 |                   |          |
|                       |           | 64                                 | 65   | CG                  | )         |                                   | 64       | 65                  | CG        | )                               |                            |                                            |                                 |                   |          |
|                       |           | 79                                 | 80   | CG                  | )         |                                   | 79       | 80                  | CG        | )                               |                            |                                            |                                 |                   |          |
| 2                     | 6         | 17                                 | 22   | GUGGUC              | (.[.]     | 3ADD C                            | 17       | 22                  | GUGGUC    | (.[.]                           | identical                  | 100.0                                      | 100.0                           | 2.4               | -111.3   |
| 3                     | 9         | 33                                 | 41   | ACUUCAGAU           | (.....)   | 3ADC D                            | 125      | 133                 | ACUUCAGAU | (.....)                         | identical                  | 100.0                                      | 100.0                           | 2.9               | -67.1    |
| 4                     | 6         | 53                                 | 58   | CGAGUG              | (....)    | 3ADD D                            | 145      | 150                 | CGAGUG    | (....)                          | identical                  | 100.0                                      | 100.0                           | 2.4               | -98.3    |
| 5                     | 9         | 68                                 | 76   | GUUCAAUUC           | (.][....) | 1ASZ R                            | 52       | 60                  | GUUCAAUUC | (.][....)                       | identical                  | 100.0                                      | 100.0                           | 3.0               | -165.8   |
| <b>Stems</b>          |           |                                    |      |                     |           |                                   |          |                     |           |                                 |                            |                                            |                                 |                   |          |
| 1                     | 18        | 1                                  | 9    | GGCCGCCG            | (((((((   | 3ADC C                            | 1        | 9                   | GGCCGCCG  | (((((((                         | identical                  | 100.0                                      | 100.0                           | 2.9               | -349.3   |
|                       |           | 80                                 | 88   | GCGGCGCC            | ))))))))) |                                   | 80       | 88                  | GCGGCGCC  | )))))))))                       |                            |                                            |                                 |                   |          |
| 2                     | 12        | 12                                 | 17   | CCGGGG              | ((((      | 3ADC D                            | 104      | 109                 | CCGGGG    | ((((                            | identical                  | 100.0                                      | 100.0                           | 2.9               | -240.5   |
|                       |           | 22                                 | 27   | CCCCGG              | ))))      |                                   | 114      | 119                 | CCCCGG    | ))))                            |                            |                                            |                                 |                   |          |
| 3                     | 12        | 28                                 | 33   | GCCGGA              | ((((      | 3ADC C                            | 28       | 33                  | GCCGGA    | ((((                            | identical                  | 100.0                                      | 100.0                           | 2.9               | -220.5   |
|                       |           | 41                                 | 46   | UCCGGC              | ))))      |                                   | 41       | 46                  | UCCGGC    | ))))                            |                            |                                            |                                 |                   |          |
| 4                     | 14        | 47                                 | 53   | GCGCCCC             | (((((((   | 3ADC D                            | 139      | 145                 | GCGCCCC   | (((((((                         | identical                  | 100.0                                      | 100.0                           | 2.9               | -279.7   |
|                       |           | 58                                 | 64   | GGGGCGC             | ))))))))) |                                   | 150      | 156                 | GGGGCGC   | )))))))))                       |                            |                                            |                                 |                   |          |
| 5                     | 8         | 65                                 | 68   | GGGG                | (((       | 3FIN A                            | 2598     | 2601                | GGGG      | (((                             | identical                  | 100.0                                      | 100.0                           | 6.4               | -40.7    |
|                       |           | 76                                 | 79   | CCCC                | )))       |                                   | 2730     | 2733                | CCCC      | )))                             |                            |                                            |                                 |                   |          |

**PDB code 3ADB; five-way-junction (tRNA)**  
 GGCCGCGCCACCGGGGUGGUCCCCGGGCCGGAUCUUCAGAUCCGGCGCGCCCCGAGUGGGGCGCGGGGUCAAUCCCCGCGCGCCGCCA  
 (((((((((...((((((.....))))))((((((.....))))))((((((.....))))))((((((.....)))))))))....

**Input data**  
 Secondary structure derived from the RNA FRABASE  
 The square bracket to note G20-C71 interaction was removed.

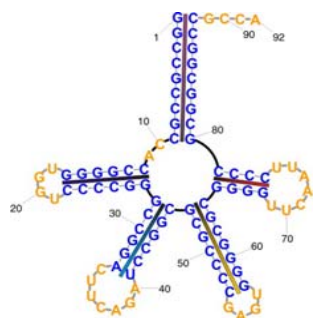

Secondary structure visualization

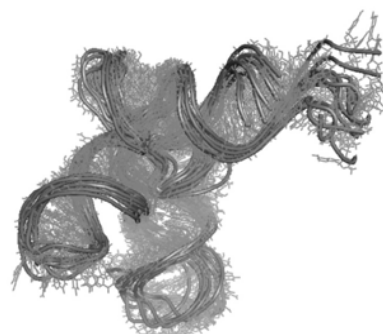

10 superimposed 3D models

| Model No. | Energy [kcal/mol] | r.m.s.d. [Å] |
|-----------|-------------------|--------------|
| 1         | -2388             | 5.1          |
| 2         | -2333             | 5.1          |
| 3         | -2361             | 6.7          |
| 4         | -2319             | 6.3          |
| 5         | -2393             | 4.8          |
| 6         | -2350             | 4.8          |
| 7         | -2322             | 6.3          |
| 8         | -2372             | 6.2          |
| 9         | -2334             | 5.7          |
| 10        | -2389             | 6.7          |

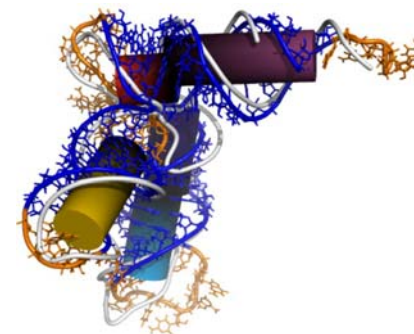

Lowest r.m.s.d. 3D model (No. 5)

**Details of the model No. 5 prediction <sup>a)</sup>**

| No.                   | Size [nt] | Target secondary structure element |      |                     |            | Source tertiary structure element |          |                     |           | Selection criteria              |                            |                                            |                                 |                   |          |
|-----------------------|-----------|------------------------------------|------|---------------------|------------|-----------------------------------|----------|---------------------|-----------|---------------------------------|----------------------------|--------------------------------------------|---------------------------------|-------------------|----------|
|                       |           | localization                       |      | secondary structure |            | localization                      |          | secondary structure |           | secondary structure topology b) | sequence similarity [%] c) | pyrimidines / purines compatibility [%] d) | source structure resolution [Å] | energy [kcal/mol] |          |
|                       |           | residues                           |      | sequence            | topology   | PDB ID                            | residues |                     | sequence  |                                 |                            |                                            |                                 |                   | topology |
|                       |           | first                              | last |                     |            |                                   | first    | last                |           |                                 |                            |                                            |                                 |                   |          |
| <b>Single strands</b> |           |                                    |      |                     |            |                                   |          |                     |           |                                 |                            |                                            |                                 |                   |          |
| 0                     | 5         | 88                                 | 92   | CGCCA               | )....      | 1FIR A                            | 72       | 76                  | CGCCA     | )....                           | identical                  | 100.0                                      | 100.0                           | 3.3               | -46.1    |
| <b>Loops</b>          |           |                                    |      |                     |            |                                   |          |                     |           |                                 |                            |                                            |                                 |                   |          |
| 1                     | 12        | 9                                  | 12   | CCAC                | (..(       | 3ADD C                            | 9        | 12                  | CCAC      | (..(                            | identical                  | 100.0                                      | 100.0                           | 2.4               | -9.2     |
|                       |           | 27                                 | 28   | GG                  | )          |                                   | 27       | 28                  | GG        | )                               |                            |                                            |                                 |                   |          |
|                       |           | 46                                 | 47   | CG                  | )          |                                   | 46       | 47                  | CG        | )                               |                            |                                            |                                 |                   |          |
|                       |           | 64                                 | 65   | CG                  | )          |                                   | 64       | 65                  | CG        | )                               |                            |                                            |                                 |                   |          |
|                       |           | 79                                 | 80   | CG                  | )          |                                   | 79       | 80                  | CG        | )                               |                            |                                            |                                 |                   |          |
| 2                     | 6         | 17                                 | 22   | GUGGUC              | (..[.)     | 3JYX 5                            | 1022     | 1027                | GUCUUC    | (.....)                         | identical                  | 66.7                                       | 66.7                            | 8.9               | -110.4   |
| 3                     | 9         | 33                                 | 41   | ACUUCAGAU           | (.....)    | 3ADC D                            | 125      | 133                 | ACUUCAGAU | (.....)                         | identical                  | 100.0                                      | 100.0                           | 2.9               | -67.1    |
| 4                     | 6         | 53                                 | 58   | CGAGUG              | (.....)    | 3ADD C                            | 53       | 58                  | CGAGUG    | (.....)                         | identical                  | 100.0                                      | 100.0                           | 2.4               | -13.7    |
| 5                     | 9         | 68                                 | 76   | GUUCAAUUC           | (..[.....) | 486D A                            | 52       | 60                  | GUUCAAUUC | (.....)                         | identical                  | 100.0                                      | 100.0                           | 7.5               | -2.9     |
| <b>Stems</b>          |           |                                    |      |                     |            |                                   |          |                     |           |                                 |                            |                                            |                                 |                   |          |
| 1                     | 18        | 1                                  | 9    | GGCCGCCG            | (((((((    | 3ADD D                            | 93       | 101                 | GGCCGCCG  | (((((((                         | identical                  | 100.0                                      | 100.0                           | 2.4               | -231.7   |
|                       |           | 80                                 | 88   | GCGGCGGC            | ))))))     |                                   | 172      | 180                 | GCGGCGGC  | ))))))                          |                            |                                            |                                 |                   |          |
| 2                     | 12        | 12                                 | 17   | CCGGGG              | ((((       | 3ADD D                            | 104      | 109                 | CCGGGG    | ((((                            | identical                  | 100.0                                      | 100.0                           | 2.4               | -252.4   |
|                       |           | 22                                 | 27   | CCCCGG              | ))))       |                                   | 114      | 119                 | CCCCGG    | ))))                            |                            |                                            |                                 |                   |          |
| 3                     | 12        | 28                                 | 33   | GCCGGA              | ((((       | 3ADC D                            | 120      | 125                 | GCCGGA    | ((((                            | identical                  | 100.0                                      | 100.0                           | 2.9               | -242.1   |
|                       |           | 41                                 | 46   | UCCGGC              | ))))       |                                   | 133      | 138                 | UCCGGC    | ))))                            |                            |                                            |                                 |                   |          |
| 4                     | 14        | 47                                 | 53   | GCGCCCC             | ((((       | 3ADC D                            | 139      | 145                 | GCGCCCC   | ((((                            | identical                  | 100.0                                      | 100.0                           | 2.9               | -279.7   |
|                       |           | 58                                 | 64   | GGGGCG              | ))))       |                                   | 150      | 156                 | GGGGCG    | ))))                            |                            |                                            |                                 |                   |          |
| 5                     | 8         | 65                                 | 68   | GGGG                | (((        | 3I8F A                            | 2650     | 2653                | GGGG      | (((                             | identical                  | 100.0                                      | 100.0                           | 3.1               | -171.6   |
|                       |           | 76                                 | 79   | CCCC                | )))        |                                   | 2782     | 2785                | CCCC      | )))                             |                            |                                            |                                 |                   |          |

- a) all the 3D structure elements comprised by the respective crystal PDB structure were excluded from the dictionary
- b) encompassing the structure element size, number and length of RNA strands
- c) similarity between the target and source RNA sequence
- d) shows matching of the purine / pyrimidine residues for the target and source RNA of given sequence

**TABLE S7.** The quality of 3D models predicted<sup>a)</sup> for the 5S rRNA *H. Marismortui* (PDB code 1FFK)

| <p><b>Sequence:</b><br/>                 UUAGCGGGCCACAGCGGUGGGGUUGCCUCCCGUACCCAUCCCGAACACGGAAGAUAGCCCACCAGCGUUCGGGGAGUAC<br/>                 UGGAGUGCGCGAGCCUCUGGGAAACCCGGUUCGCCGCCACC</p>                                                                                                                                                                                                                                                                                                                                                                                                                                                                                                                                                                                                                                                                                                                                                                                                                                                                                                                                                                                                                                                                          |                   |              |                                                                                                                                                                                                                                                                                                                                                                         |                    |              |                    |                    |   |       |     |      |      |   |      |     |      |      |   |       |     |      |      |   |       |     |      |      |   |       |     |      |      |   |       |     |      |      |   |       |     |      |      |   |       |     |      |      |   |       |     |      |      |    |       |     |      |      |      |  |     |      |      |          |  |     |      |      |                                                                                                                                                                                                                                                                                                                                                                                                                                                                                                                                                                                                                                                                                                                                                                                                                                                                                                                                                                                                                                                                                                                                                                                                                                                                                |  |       |                   |              |                    |                    |   |       |      |      |      |   |       |      |      |      |   |       |      |      |      |   |       |      |      |      |   |       |     |      |      |   |       |      |      |      |   |       |      |      |      |   |       |     |      |      |   |       |      |      |      |    |       |      |      |      |      |  |      |      |      |          |  |     |      |      |
|----------------------------------------------------------------------------------------------------------------------------------------------------------------------------------------------------------------------------------------------------------------------------------------------------------------------------------------------------------------------------------------------------------------------------------------------------------------------------------------------------------------------------------------------------------------------------------------------------------------------------------------------------------------------------------------------------------------------------------------------------------------------------------------------------------------------------------------------------------------------------------------------------------------------------------------------------------------------------------------------------------------------------------------------------------------------------------------------------------------------------------------------------------------------------------------------------------------------------------------------------------------------|-------------------|--------------|-------------------------------------------------------------------------------------------------------------------------------------------------------------------------------------------------------------------------------------------------------------------------------------------------------------------------------------------------------------------------|--------------------|--------------|--------------------|--------------------|---|-------|-----|------|------|---|------|-----|------|------|---|-------|-----|------|------|---|-------|-----|------|------|---|-------|-----|------|------|---|-------|-----|------|------|---|-------|-----|------|------|---|-------|-----|------|------|---|-------|-----|------|------|----|-------|-----|------|------|------|--|-----|------|------|----------|--|-----|------|------|--------------------------------------------------------------------------------------------------------------------------------------------------------------------------------------------------------------------------------------------------------------------------------------------------------------------------------------------------------------------------------------------------------------------------------------------------------------------------------------------------------------------------------------------------------------------------------------------------------------------------------------------------------------------------------------------------------------------------------------------------------------------------------------------------------------------------------------------------------------------------------------------------------------------------------------------------------------------------------------------------------------------------------------------------------------------------------------------------------------------------------------------------------------------------------------------------------------------------------------------------------------------------------|--|-------|-------------------|--------------|--------------------|--------------------|---|-------|------|------|------|---|-------|------|------|------|---|-------|------|------|------|---|-------|------|------|------|---|-------|-----|------|------|---|-------|------|------|------|---|-------|------|------|------|---|-------|-----|------|------|---|-------|------|------|------|----|-------|------|------|------|------|--|------|------|------|----------|--|-----|------|------|
| <p><b>Input reference secondary structure</b><br/>                 (RNA FRABASE database):<br/>                 ...(((((((.....((((((((.....(((((((... (...<br/>                 ...)))))...)))))...)))))...))...(((((((...<br/>                 ..(((((((.....)))))...)))))...)))))...)))))<br/>                 ))...)</p>                                                                                                                                                                                                                                                                                                                                                                                                                                                                                                                                                                                                                                                                                                                                                                                                                                                                                                                                         |                   |              | <p><b>Input determined in this work secondary structure</b><br/>                 RNAstructure &amp; SHAPE ; MCC<sup>b)</sup> = 0.99):<br/>                 ...(((((((.....((((((((.....(((((((... (...<br/>                 ...)))))...)))))...)))))...))...(((((((...<br/>                 ..(((((((.....)))))...)))))...)))))...)))))<br/>                 ))...)</p> |                    |              |                    |                    |   |       |     |      |      |   |      |     |      |      |   |       |     |      |      |   |       |     |      |      |   |       |     |      |      |   |       |     |      |      |   |       |     |      |      |   |       |     |      |      |   |       |     |      |      |    |       |     |      |      |      |  |     |      |      |          |  |     |      |      |                                                                                                                                                                                                                                                                                                                                                                                                                                                                                                                                                                                                                                                                                                                                                                                                                                                                                                                                                                                                                                                                                                                                                                                                                                                                                |  |       |                   |              |                    |                    |   |       |      |      |      |   |       |      |      |      |   |       |      |      |      |   |       |      |      |      |   |       |     |      |      |   |       |      |      |      |   |       |      |      |      |   |       |     |      |      |   |       |      |      |      |    |       |      |      |      |      |  |      |      |      |          |  |     |      |      |
| <p><b>Prediction output – 10 models.</b></p> <p><b>Structure models energy<sup>c)</sup> and selected parameters defining models quality<sup>d),e)</sup></b></p> <table border="1"> <thead> <tr> <th>Model</th> <th>energy [kcal/mol]</th> <th>r.m.s.d. [Å]</th> <th>INF<sup>cbp</sup></th> <th>INF<sup>all</sup></th> </tr> </thead> <tbody> <tr><td>1</td><td>-2952</td><td>3.3</td><td>1.00</td><td>0.83</td></tr> <tr><td>2</td><td>n.a.</td><td>3.6</td><td>1.00</td><td>0.83</td></tr> <tr><td>3</td><td>-2920</td><td>5.6</td><td>1.00</td><td>0.81</td></tr> <tr><td>4</td><td>-2902</td><td>4.0</td><td>1.00</td><td>0.82</td></tr> <tr><td>5</td><td>-2960</td><td>3.8</td><td>1.00</td><td>0.83</td></tr> <tr><td>6</td><td>-2903</td><td>3.9</td><td>1.00</td><td>0.81</td></tr> <tr><td>7</td><td>-2871</td><td>4.5</td><td>1.00</td><td>0.79</td></tr> <tr><td>8</td><td>-2881</td><td>3.8</td><td>1.00</td><td>0.82</td></tr> <tr><td>9</td><td>-2865</td><td>3.6</td><td>1.00</td><td>0.81</td></tr> <tr><td>10</td><td>-2925</td><td>3.5</td><td>1.00</td><td>0.83</td></tr> <tr><td colspan="2">mean</td><td>4.0</td><td>1.00</td><td>0.82</td></tr> <tr><td colspan="2">st. dev.</td><td>0.6</td><td>0.00</td><td>0.02</td></tr> </tbody> </table> |                   |              | Model                                                                                                                                                                                                                                                                                                                                                                   | energy [kcal/mol]  | r.m.s.d. [Å] | INF <sup>cbp</sup> | INF <sup>all</sup> | 1 | -2952 | 3.3 | 1.00 | 0.83 | 2 | n.a. | 3.6 | 1.00 | 0.83 | 3 | -2920 | 5.6 | 1.00 | 0.81 | 4 | -2902 | 4.0 | 1.00 | 0.82 | 5 | -2960 | 3.8 | 1.00 | 0.83 | 6 | -2903 | 3.9 | 1.00 | 0.81 | 7 | -2871 | 4.5 | 1.00 | 0.79 | 8 | -2881 | 3.8 | 1.00 | 0.82 | 9 | -2865 | 3.6 | 1.00 | 0.81 | 10 | -2925 | 3.5 | 1.00 | 0.83 | mean |  | 4.0 | 1.00 | 0.82 | st. dev. |  | 0.6 | 0.00 | 0.02 | <p><b>Prediction output – 10 models.</b></p> <p><b>Structure models energy<sup>c)</sup> and selected parameters defining models quality<sup>d),e)</sup></b></p> <table border="1"> <thead> <tr> <th>Model</th> <th>energy [kcal/mol]</th> <th>r.m.s.d. [Å]</th> <th>INF<sup>cbp</sup></th> <th>INF<sup>all</sup></th> </tr> </thead> <tbody> <tr><td>1</td><td>-2846</td><td>11.4</td><td>0.94</td><td>0.81</td></tr> <tr><td>2</td><td>-2905</td><td>10.9</td><td>1.00</td><td>0.79</td></tr> <tr><td>3</td><td>-2790</td><td>15.1</td><td>0.94</td><td>0.77</td></tr> <tr><td>4</td><td>-2872</td><td>13.2</td><td>0.97</td><td>0.78</td></tr> <tr><td>5</td><td>-2749</td><td>9.4</td><td>0.97</td><td>0.74</td></tr> <tr><td>6</td><td>-2888</td><td>13.1</td><td>1.00</td><td>0.77</td></tr> <tr><td>7</td><td>-2854</td><td>13.7</td><td>0.94</td><td>0.80</td></tr> <tr><td>8</td><td>-2873</td><td>9.5</td><td>0.97</td><td>0.76</td></tr> <tr><td>9</td><td>-2837</td><td>14.1</td><td>0.95</td><td>0.75</td></tr> <tr><td>10</td><td>-2853</td><td>10.6</td><td>0.94</td><td>0.77</td></tr> <tr><td colspan="2">mean</td><td>12.1</td><td>0.96</td><td>0.77</td></tr> <tr><td colspan="2">st. dev.</td><td>1.9</td><td>0.03</td><td>0.03</td></tr> </tbody> </table> |  | Model | energy [kcal/mol] | r.m.s.d. [Å] | INF <sup>cbp</sup> | INF <sup>all</sup> | 1 | -2846 | 11.4 | 0.94 | 0.81 | 2 | -2905 | 10.9 | 1.00 | 0.79 | 3 | -2790 | 15.1 | 0.94 | 0.77 | 4 | -2872 | 13.2 | 0.97 | 0.78 | 5 | -2749 | 9.4 | 0.97 | 0.74 | 6 | -2888 | 13.1 | 1.00 | 0.77 | 7 | -2854 | 13.7 | 0.94 | 0.80 | 8 | -2873 | 9.5 | 0.97 | 0.76 | 9 | -2837 | 14.1 | 0.95 | 0.75 | 10 | -2853 | 10.6 | 0.94 | 0.77 | mean |  | 12.1 | 0.96 | 0.77 | st. dev. |  | 1.9 | 0.03 | 0.03 |
| Model                                                                                                                                                                                                                                                                                                                                                                                                                                                                                                                                                                                                                                                                                                                                                                                                                                                                                                                                                                                                                                                                                                                                                                                                                                                                | energy [kcal/mol] | r.m.s.d. [Å] | INF <sup>cbp</sup>                                                                                                                                                                                                                                                                                                                                                      | INF <sup>all</sup> |              |                    |                    |   |       |     |      |      |   |      |     |      |      |   |       |     |      |      |   |       |     |      |      |   |       |     |      |      |   |       |     |      |      |   |       |     |      |      |   |       |     |      |      |   |       |     |      |      |    |       |     |      |      |      |  |     |      |      |          |  |     |      |      |                                                                                                                                                                                                                                                                                                                                                                                                                                                                                                                                                                                                                                                                                                                                                                                                                                                                                                                                                                                                                                                                                                                                                                                                                                                                                |  |       |                   |              |                    |                    |   |       |      |      |      |   |       |      |      |      |   |       |      |      |      |   |       |      |      |      |   |       |     |      |      |   |       |      |      |      |   |       |      |      |      |   |       |     |      |      |   |       |      |      |      |    |       |      |      |      |      |  |      |      |      |          |  |     |      |      |
| 1                                                                                                                                                                                                                                                                                                                                                                                                                                                                                                                                                                                                                                                                                                                                                                                                                                                                                                                                                                                                                                                                                                                                                                                                                                                                    | -2952             | 3.3          | 1.00                                                                                                                                                                                                                                                                                                                                                                    | 0.83               |              |                    |                    |   |       |     |      |      |   |      |     |      |      |   |       |     |      |      |   |       |     |      |      |   |       |     |      |      |   |       |     |      |      |   |       |     |      |      |   |       |     |      |      |   |       |     |      |      |    |       |     |      |      |      |  |     |      |      |          |  |     |      |      |                                                                                                                                                                                                                                                                                                                                                                                                                                                                                                                                                                                                                                                                                                                                                                                                                                                                                                                                                                                                                                                                                                                                                                                                                                                                                |  |       |                   |              |                    |                    |   |       |      |      |      |   |       |      |      |      |   |       |      |      |      |   |       |      |      |      |   |       |     |      |      |   |       |      |      |      |   |       |      |      |      |   |       |     |      |      |   |       |      |      |      |    |       |      |      |      |      |  |      |      |      |          |  |     |      |      |
| 2                                                                                                                                                                                                                                                                                                                                                                                                                                                                                                                                                                                                                                                                                                                                                                                                                                                                                                                                                                                                                                                                                                                                                                                                                                                                    | n.a.              | 3.6          | 1.00                                                                                                                                                                                                                                                                                                                                                                    | 0.83               |              |                    |                    |   |       |     |      |      |   |      |     |      |      |   |       |     |      |      |   |       |     |      |      |   |       |     |      |      |   |       |     |      |      |   |       |     |      |      |   |       |     |      |      |   |       |     |      |      |    |       |     |      |      |      |  |     |      |      |          |  |     |      |      |                                                                                                                                                                                                                                                                                                                                                                                                                                                                                                                                                                                                                                                                                                                                                                                                                                                                                                                                                                                                                                                                                                                                                                                                                                                                                |  |       |                   |              |                    |                    |   |       |      |      |      |   |       |      |      |      |   |       |      |      |      |   |       |      |      |      |   |       |     |      |      |   |       |      |      |      |   |       |      |      |      |   |       |     |      |      |   |       |      |      |      |    |       |      |      |      |      |  |      |      |      |          |  |     |      |      |
| 3                                                                                                                                                                                                                                                                                                                                                                                                                                                                                                                                                                                                                                                                                                                                                                                                                                                                                                                                                                                                                                                                                                                                                                                                                                                                    | -2920             | 5.6          | 1.00                                                                                                                                                                                                                                                                                                                                                                    | 0.81               |              |                    |                    |   |       |     |      |      |   |      |     |      |      |   |       |     |      |      |   |       |     |      |      |   |       |     |      |      |   |       |     |      |      |   |       |     |      |      |   |       |     |      |      |   |       |     |      |      |    |       |     |      |      |      |  |     |      |      |          |  |     |      |      |                                                                                                                                                                                                                                                                                                                                                                                                                                                                                                                                                                                                                                                                                                                                                                                                                                                                                                                                                                                                                                                                                                                                                                                                                                                                                |  |       |                   |              |                    |                    |   |       |      |      |      |   |       |      |      |      |   |       |      |      |      |   |       |      |      |      |   |       |     |      |      |   |       |      |      |      |   |       |      |      |      |   |       |     |      |      |   |       |      |      |      |    |       |      |      |      |      |  |      |      |      |          |  |     |      |      |
| 4                                                                                                                                                                                                                                                                                                                                                                                                                                                                                                                                                                                                                                                                                                                                                                                                                                                                                                                                                                                                                                                                                                                                                                                                                                                                    | -2902             | 4.0          | 1.00                                                                                                                                                                                                                                                                                                                                                                    | 0.82               |              |                    |                    |   |       |     |      |      |   |      |     |      |      |   |       |     |      |      |   |       |     |      |      |   |       |     |      |      |   |       |     |      |      |   |       |     |      |      |   |       |     |      |      |   |       |     |      |      |    |       |     |      |      |      |  |     |      |      |          |  |     |      |      |                                                                                                                                                                                                                                                                                                                                                                                                                                                                                                                                                                                                                                                                                                                                                                                                                                                                                                                                                                                                                                                                                                                                                                                                                                                                                |  |       |                   |              |                    |                    |   |       |      |      |      |   |       |      |      |      |   |       |      |      |      |   |       |      |      |      |   |       |     |      |      |   |       |      |      |      |   |       |      |      |      |   |       |     |      |      |   |       |      |      |      |    |       |      |      |      |      |  |      |      |      |          |  |     |      |      |
| 5                                                                                                                                                                                                                                                                                                                                                                                                                                                                                                                                                                                                                                                                                                                                                                                                                                                                                                                                                                                                                                                                                                                                                                                                                                                                    | -2960             | 3.8          | 1.00                                                                                                                                                                                                                                                                                                                                                                    | 0.83               |              |                    |                    |   |       |     |      |      |   |      |     |      |      |   |       |     |      |      |   |       |     |      |      |   |       |     |      |      |   |       |     |      |      |   |       |     |      |      |   |       |     |      |      |   |       |     |      |      |    |       |     |      |      |      |  |     |      |      |          |  |     |      |      |                                                                                                                                                                                                                                                                                                                                                                                                                                                                                                                                                                                                                                                                                                                                                                                                                                                                                                                                                                                                                                                                                                                                                                                                                                                                                |  |       |                   |              |                    |                    |   |       |      |      |      |   |       |      |      |      |   |       |      |      |      |   |       |      |      |      |   |       |     |      |      |   |       |      |      |      |   |       |      |      |      |   |       |     |      |      |   |       |      |      |      |    |       |      |      |      |      |  |      |      |      |          |  |     |      |      |
| 6                                                                                                                                                                                                                                                                                                                                                                                                                                                                                                                                                                                                                                                                                                                                                                                                                                                                                                                                                                                                                                                                                                                                                                                                                                                                    | -2903             | 3.9          | 1.00                                                                                                                                                                                                                                                                                                                                                                    | 0.81               |              |                    |                    |   |       |     |      |      |   |      |     |      |      |   |       |     |      |      |   |       |     |      |      |   |       |     |      |      |   |       |     |      |      |   |       |     |      |      |   |       |     |      |      |   |       |     |      |      |    |       |     |      |      |      |  |     |      |      |          |  |     |      |      |                                                                                                                                                                                                                                                                                                                                                                                                                                                                                                                                                                                                                                                                                                                                                                                                                                                                                                                                                                                                                                                                                                                                                                                                                                                                                |  |       |                   |              |                    |                    |   |       |      |      |      |   |       |      |      |      |   |       |      |      |      |   |       |      |      |      |   |       |     |      |      |   |       |      |      |      |   |       |      |      |      |   |       |     |      |      |   |       |      |      |      |    |       |      |      |      |      |  |      |      |      |          |  |     |      |      |
| 7                                                                                                                                                                                                                                                                                                                                                                                                                                                                                                                                                                                                                                                                                                                                                                                                                                                                                                                                                                                                                                                                                                                                                                                                                                                                    | -2871             | 4.5          | 1.00                                                                                                                                                                                                                                                                                                                                                                    | 0.79               |              |                    |                    |   |       |     |      |      |   |      |     |      |      |   |       |     |      |      |   |       |     |      |      |   |       |     |      |      |   |       |     |      |      |   |       |     |      |      |   |       |     |      |      |   |       |     |      |      |    |       |     |      |      |      |  |     |      |      |          |  |     |      |      |                                                                                                                                                                                                                                                                                                                                                                                                                                                                                                                                                                                                                                                                                                                                                                                                                                                                                                                                                                                                                                                                                                                                                                                                                                                                                |  |       |                   |              |                    |                    |   |       |      |      |      |   |       |      |      |      |   |       |      |      |      |   |       |      |      |      |   |       |     |      |      |   |       |      |      |      |   |       |      |      |      |   |       |     |      |      |   |       |      |      |      |    |       |      |      |      |      |  |      |      |      |          |  |     |      |      |
| 8                                                                                                                                                                                                                                                                                                                                                                                                                                                                                                                                                                                                                                                                                                                                                                                                                                                                                                                                                                                                                                                                                                                                                                                                                                                                    | -2881             | 3.8          | 1.00                                                                                                                                                                                                                                                                                                                                                                    | 0.82               |              |                    |                    |   |       |     |      |      |   |      |     |      |      |   |       |     |      |      |   |       |     |      |      |   |       |     |      |      |   |       |     |      |      |   |       |     |      |      |   |       |     |      |      |   |       |     |      |      |    |       |     |      |      |      |  |     |      |      |          |  |     |      |      |                                                                                                                                                                                                                                                                                                                                                                                                                                                                                                                                                                                                                                                                                                                                                                                                                                                                                                                                                                                                                                                                                                                                                                                                                                                                                |  |       |                   |              |                    |                    |   |       |      |      |      |   |       |      |      |      |   |       |      |      |      |   |       |      |      |      |   |       |     |      |      |   |       |      |      |      |   |       |      |      |      |   |       |     |      |      |   |       |      |      |      |    |       |      |      |      |      |  |      |      |      |          |  |     |      |      |
| 9                                                                                                                                                                                                                                                                                                                                                                                                                                                                                                                                                                                                                                                                                                                                                                                                                                                                                                                                                                                                                                                                                                                                                                                                                                                                    | -2865             | 3.6          | 1.00                                                                                                                                                                                                                                                                                                                                                                    | 0.81               |              |                    |                    |   |       |     |      |      |   |      |     |      |      |   |       |     |      |      |   |       |     |      |      |   |       |     |      |      |   |       |     |      |      |   |       |     |      |      |   |       |     |      |      |   |       |     |      |      |    |       |     |      |      |      |  |     |      |      |          |  |     |      |      |                                                                                                                                                                                                                                                                                                                                                                                                                                                                                                                                                                                                                                                                                                                                                                                                                                                                                                                                                                                                                                                                                                                                                                                                                                                                                |  |       |                   |              |                    |                    |   |       |      |      |      |   |       |      |      |      |   |       |      |      |      |   |       |      |      |      |   |       |     |      |      |   |       |      |      |      |   |       |      |      |      |   |       |     |      |      |   |       |      |      |      |    |       |      |      |      |      |  |      |      |      |          |  |     |      |      |
| 10                                                                                                                                                                                                                                                                                                                                                                                                                                                                                                                                                                                                                                                                                                                                                                                                                                                                                                                                                                                                                                                                                                                                                                                                                                                                   | -2925             | 3.5          | 1.00                                                                                                                                                                                                                                                                                                                                                                    | 0.83               |              |                    |                    |   |       |     |      |      |   |      |     |      |      |   |       |     |      |      |   |       |     |      |      |   |       |     |      |      |   |       |     |      |      |   |       |     |      |      |   |       |     |      |      |   |       |     |      |      |    |       |     |      |      |      |  |     |      |      |          |  |     |      |      |                                                                                                                                                                                                                                                                                                                                                                                                                                                                                                                                                                                                                                                                                                                                                                                                                                                                                                                                                                                                                                                                                                                                                                                                                                                                                |  |       |                   |              |                    |                    |   |       |      |      |      |   |       |      |      |      |   |       |      |      |      |   |       |      |      |      |   |       |     |      |      |   |       |      |      |      |   |       |      |      |      |   |       |     |      |      |   |       |      |      |      |    |       |      |      |      |      |  |      |      |      |          |  |     |      |      |
| mean                                                                                                                                                                                                                                                                                                                                                                                                                                                                                                                                                                                                                                                                                                                                                                                                                                                                                                                                                                                                                                                                                                                                                                                                                                                                 |                   | 4.0          | 1.00                                                                                                                                                                                                                                                                                                                                                                    | 0.82               |              |                    |                    |   |       |     |      |      |   |      |     |      |      |   |       |     |      |      |   |       |     |      |      |   |       |     |      |      |   |       |     |      |      |   |       |     |      |      |   |       |     |      |      |   |       |     |      |      |    |       |     |      |      |      |  |     |      |      |          |  |     |      |      |                                                                                                                                                                                                                                                                                                                                                                                                                                                                                                                                                                                                                                                                                                                                                                                                                                                                                                                                                                                                                                                                                                                                                                                                                                                                                |  |       |                   |              |                    |                    |   |       |      |      |      |   |       |      |      |      |   |       |      |      |      |   |       |      |      |      |   |       |     |      |      |   |       |      |      |      |   |       |      |      |      |   |       |     |      |      |   |       |      |      |      |    |       |      |      |      |      |  |      |      |      |          |  |     |      |      |
| st. dev.                                                                                                                                                                                                                                                                                                                                                                                                                                                                                                                                                                                                                                                                                                                                                                                                                                                                                                                                                                                                                                                                                                                                                                                                                                                             |                   | 0.6          | 0.00                                                                                                                                                                                                                                                                                                                                                                    | 0.02               |              |                    |                    |   |       |     |      |      |   |      |     |      |      |   |       |     |      |      |   |       |     |      |      |   |       |     |      |      |   |       |     |      |      |   |       |     |      |      |   |       |     |      |      |   |       |     |      |      |    |       |     |      |      |      |  |     |      |      |          |  |     |      |      |                                                                                                                                                                                                                                                                                                                                                                                                                                                                                                                                                                                                                                                                                                                                                                                                                                                                                                                                                                                                                                                                                                                                                                                                                                                                                |  |       |                   |              |                    |                    |   |       |      |      |      |   |       |      |      |      |   |       |      |      |      |   |       |      |      |      |   |       |     |      |      |   |       |      |      |      |   |       |      |      |      |   |       |     |      |      |   |       |      |      |      |    |       |      |      |      |      |  |      |      |      |          |  |     |      |      |
| Model                                                                                                                                                                                                                                                                                                                                                                                                                                                                                                                                                                                                                                                                                                                                                                                                                                                                                                                                                                                                                                                                                                                                                                                                                                                                | energy [kcal/mol] | r.m.s.d. [Å] | INF <sup>cbp</sup>                                                                                                                                                                                                                                                                                                                                                      | INF <sup>all</sup> |              |                    |                    |   |       |     |      |      |   |      |     |      |      |   |       |     |      |      |   |       |     |      |      |   |       |     |      |      |   |       |     |      |      |   |       |     |      |      |   |       |     |      |      |   |       |     |      |      |    |       |     |      |      |      |  |     |      |      |          |  |     |      |      |                                                                                                                                                                                                                                                                                                                                                                                                                                                                                                                                                                                                                                                                                                                                                                                                                                                                                                                                                                                                                                                                                                                                                                                                                                                                                |  |       |                   |              |                    |                    |   |       |      |      |      |   |       |      |      |      |   |       |      |      |      |   |       |      |      |      |   |       |     |      |      |   |       |      |      |      |   |       |      |      |      |   |       |     |      |      |   |       |      |      |      |    |       |      |      |      |      |  |      |      |      |          |  |     |      |      |
| 1                                                                                                                                                                                                                                                                                                                                                                                                                                                                                                                                                                                                                                                                                                                                                                                                                                                                                                                                                                                                                                                                                                                                                                                                                                                                    | -2846             | 11.4         | 0.94                                                                                                                                                                                                                                                                                                                                                                    | 0.81               |              |                    |                    |   |       |     |      |      |   |      |     |      |      |   |       |     |      |      |   |       |     |      |      |   |       |     |      |      |   |       |     |      |      |   |       |     |      |      |   |       |     |      |      |   |       |     |      |      |    |       |     |      |      |      |  |     |      |      |          |  |     |      |      |                                                                                                                                                                                                                                                                                                                                                                                                                                                                                                                                                                                                                                                                                                                                                                                                                                                                                                                                                                                                                                                                                                                                                                                                                                                                                |  |       |                   |              |                    |                    |   |       |      |      |      |   |       |      |      |      |   |       |      |      |      |   |       |      |      |      |   |       |     |      |      |   |       |      |      |      |   |       |      |      |      |   |       |     |      |      |   |       |      |      |      |    |       |      |      |      |      |  |      |      |      |          |  |     |      |      |
| 2                                                                                                                                                                                                                                                                                                                                                                                                                                                                                                                                                                                                                                                                                                                                                                                                                                                                                                                                                                                                                                                                                                                                                                                                                                                                    | -2905             | 10.9         | 1.00                                                                                                                                                                                                                                                                                                                                                                    | 0.79               |              |                    |                    |   |       |     |      |      |   |      |     |      |      |   |       |     |      |      |   |       |     |      |      |   |       |     |      |      |   |       |     |      |      |   |       |     |      |      |   |       |     |      |      |   |       |     |      |      |    |       |     |      |      |      |  |     |      |      |          |  |     |      |      |                                                                                                                                                                                                                                                                                                                                                                                                                                                                                                                                                                                                                                                                                                                                                                                                                                                                                                                                                                                                                                                                                                                                                                                                                                                                                |  |       |                   |              |                    |                    |   |       |      |      |      |   |       |      |      |      |   |       |      |      |      |   |       |      |      |      |   |       |     |      |      |   |       |      |      |      |   |       |      |      |      |   |       |     |      |      |   |       |      |      |      |    |       |      |      |      |      |  |      |      |      |          |  |     |      |      |
| 3                                                                                                                                                                                                                                                                                                                                                                                                                                                                                                                                                                                                                                                                                                                                                                                                                                                                                                                                                                                                                                                                                                                                                                                                                                                                    | -2790             | 15.1         | 0.94                                                                                                                                                                                                                                                                                                                                                                    | 0.77               |              |                    |                    |   |       |     |      |      |   |      |     |      |      |   |       |     |      |      |   |       |     |      |      |   |       |     |      |      |   |       |     |      |      |   |       |     |      |      |   |       |     |      |      |   |       |     |      |      |    |       |     |      |      |      |  |     |      |      |          |  |     |      |      |                                                                                                                                                                                                                                                                                                                                                                                                                                                                                                                                                                                                                                                                                                                                                                                                                                                                                                                                                                                                                                                                                                                                                                                                                                                                                |  |       |                   |              |                    |                    |   |       |      |      |      |   |       |      |      |      |   |       |      |      |      |   |       |      |      |      |   |       |     |      |      |   |       |      |      |      |   |       |      |      |      |   |       |     |      |      |   |       |      |      |      |    |       |      |      |      |      |  |      |      |      |          |  |     |      |      |
| 4                                                                                                                                                                                                                                                                                                                                                                                                                                                                                                                                                                                                                                                                                                                                                                                                                                                                                                                                                                                                                                                                                                                                                                                                                                                                    | -2872             | 13.2         | 0.97                                                                                                                                                                                                                                                                                                                                                                    | 0.78               |              |                    |                    |   |       |     |      |      |   |      |     |      |      |   |       |     |      |      |   |       |     |      |      |   |       |     |      |      |   |       |     |      |      |   |       |     |      |      |   |       |     |      |      |   |       |     |      |      |    |       |     |      |      |      |  |     |      |      |          |  |     |      |      |                                                                                                                                                                                                                                                                                                                                                                                                                                                                                                                                                                                                                                                                                                                                                                                                                                                                                                                                                                                                                                                                                                                                                                                                                                                                                |  |       |                   |              |                    |                    |   |       |      |      |      |   |       |      |      |      |   |       |      |      |      |   |       |      |      |      |   |       |     |      |      |   |       |      |      |      |   |       |      |      |      |   |       |     |      |      |   |       |      |      |      |    |       |      |      |      |      |  |      |      |      |          |  |     |      |      |
| 5                                                                                                                                                                                                                                                                                                                                                                                                                                                                                                                                                                                                                                                                                                                                                                                                                                                                                                                                                                                                                                                                                                                                                                                                                                                                    | -2749             | 9.4          | 0.97                                                                                                                                                                                                                                                                                                                                                                    | 0.74               |              |                    |                    |   |       |     |      |      |   |      |     |      |      |   |       |     |      |      |   |       |     |      |      |   |       |     |      |      |   |       |     |      |      |   |       |     |      |      |   |       |     |      |      |   |       |     |      |      |    |       |     |      |      |      |  |     |      |      |          |  |     |      |      |                                                                                                                                                                                                                                                                                                                                                                                                                                                                                                                                                                                                                                                                                                                                                                                                                                                                                                                                                                                                                                                                                                                                                                                                                                                                                |  |       |                   |              |                    |                    |   |       |      |      |      |   |       |      |      |      |   |       |      |      |      |   |       |      |      |      |   |       |     |      |      |   |       |      |      |      |   |       |      |      |      |   |       |     |      |      |   |       |      |      |      |    |       |      |      |      |      |  |      |      |      |          |  |     |      |      |
| 6                                                                                                                                                                                                                                                                                                                                                                                                                                                                                                                                                                                                                                                                                                                                                                                                                                                                                                                                                                                                                                                                                                                                                                                                                                                                    | -2888             | 13.1         | 1.00                                                                                                                                                                                                                                                                                                                                                                    | 0.77               |              |                    |                    |   |       |     |      |      |   |      |     |      |      |   |       |     |      |      |   |       |     |      |      |   |       |     |      |      |   |       |     |      |      |   |       |     |      |      |   |       |     |      |      |   |       |     |      |      |    |       |     |      |      |      |  |     |      |      |          |  |     |      |      |                                                                                                                                                                                                                                                                                                                                                                                                                                                                                                                                                                                                                                                                                                                                                                                                                                                                                                                                                                                                                                                                                                                                                                                                                                                                                |  |       |                   |              |                    |                    |   |       |      |      |      |   |       |      |      |      |   |       |      |      |      |   |       |      |      |      |   |       |     |      |      |   |       |      |      |      |   |       |      |      |      |   |       |     |      |      |   |       |      |      |      |    |       |      |      |      |      |  |      |      |      |          |  |     |      |      |
| 7                                                                                                                                                                                                                                                                                                                                                                                                                                                                                                                                                                                                                                                                                                                                                                                                                                                                                                                                                                                                                                                                                                                                                                                                                                                                    | -2854             | 13.7         | 0.94                                                                                                                                                                                                                                                                                                                                                                    | 0.80               |              |                    |                    |   |       |     |      |      |   |      |     |      |      |   |       |     |      |      |   |       |     |      |      |   |       |     |      |      |   |       |     |      |      |   |       |     |      |      |   |       |     |      |      |   |       |     |      |      |    |       |     |      |      |      |  |     |      |      |          |  |     |      |      |                                                                                                                                                                                                                                                                                                                                                                                                                                                                                                                                                                                                                                                                                                                                                                                                                                                                                                                                                                                                                                                                                                                                                                                                                                                                                |  |       |                   |              |                    |                    |   |       |      |      |      |   |       |      |      |      |   |       |      |      |      |   |       |      |      |      |   |       |     |      |      |   |       |      |      |      |   |       |      |      |      |   |       |     |      |      |   |       |      |      |      |    |       |      |      |      |      |  |      |      |      |          |  |     |      |      |
| 8                                                                                                                                                                                                                                                                                                                                                                                                                                                                                                                                                                                                                                                                                                                                                                                                                                                                                                                                                                                                                                                                                                                                                                                                                                                                    | -2873             | 9.5          | 0.97                                                                                                                                                                                                                                                                                                                                                                    | 0.76               |              |                    |                    |   |       |     |      |      |   |      |     |      |      |   |       |     |      |      |   |       |     |      |      |   |       |     |      |      |   |       |     |      |      |   |       |     |      |      |   |       |     |      |      |   |       |     |      |      |    |       |     |      |      |      |  |     |      |      |          |  |     |      |      |                                                                                                                                                                                                                                                                                                                                                                                                                                                                                                                                                                                                                                                                                                                                                                                                                                                                                                                                                                                                                                                                                                                                                                                                                                                                                |  |       |                   |              |                    |                    |   |       |      |      |      |   |       |      |      |      |   |       |      |      |      |   |       |      |      |      |   |       |     |      |      |   |       |      |      |      |   |       |      |      |      |   |       |     |      |      |   |       |      |      |      |    |       |      |      |      |      |  |      |      |      |          |  |     |      |      |
| 9                                                                                                                                                                                                                                                                                                                                                                                                                                                                                                                                                                                                                                                                                                                                                                                                                                                                                                                                                                                                                                                                                                                                                                                                                                                                    | -2837             | 14.1         | 0.95                                                                                                                                                                                                                                                                                                                                                                    | 0.75               |              |                    |                    |   |       |     |      |      |   |      |     |      |      |   |       |     |      |      |   |       |     |      |      |   |       |     |      |      |   |       |     |      |      |   |       |     |      |      |   |       |     |      |      |   |       |     |      |      |    |       |     |      |      |      |  |     |      |      |          |  |     |      |      |                                                                                                                                                                                                                                                                                                                                                                                                                                                                                                                                                                                                                                                                                                                                                                                                                                                                                                                                                                                                                                                                                                                                                                                                                                                                                |  |       |                   |              |                    |                    |   |       |      |      |      |   |       |      |      |      |   |       |      |      |      |   |       |      |      |      |   |       |     |      |      |   |       |      |      |      |   |       |      |      |      |   |       |     |      |      |   |       |      |      |      |    |       |      |      |      |      |  |      |      |      |          |  |     |      |      |
| 10                                                                                                                                                                                                                                                                                                                                                                                                                                                                                                                                                                                                                                                                                                                                                                                                                                                                                                                                                                                                                                                                                                                                                                                                                                                                   | -2853             | 10.6         | 0.94                                                                                                                                                                                                                                                                                                                                                                    | 0.77               |              |                    |                    |   |       |     |      |      |   |      |     |      |      |   |       |     |      |      |   |       |     |      |      |   |       |     |      |      |   |       |     |      |      |   |       |     |      |      |   |       |     |      |      |   |       |     |      |      |    |       |     |      |      |      |  |     |      |      |          |  |     |      |      |                                                                                                                                                                                                                                                                                                                                                                                                                                                                                                                                                                                                                                                                                                                                                                                                                                                                                                                                                                                                                                                                                                                                                                                                                                                                                |  |       |                   |              |                    |                    |   |       |      |      |      |   |       |      |      |      |   |       |      |      |      |   |       |      |      |      |   |       |     |      |      |   |       |      |      |      |   |       |      |      |      |   |       |     |      |      |   |       |      |      |      |    |       |      |      |      |      |  |      |      |      |          |  |     |      |      |
| mean                                                                                                                                                                                                                                                                                                                                                                                                                                                                                                                                                                                                                                                                                                                                                                                                                                                                                                                                                                                                                                                                                                                                                                                                                                                                 |                   | 12.1         | 0.96                                                                                                                                                                                                                                                                                                                                                                    | 0.77               |              |                    |                    |   |       |     |      |      |   |      |     |      |      |   |       |     |      |      |   |       |     |      |      |   |       |     |      |      |   |       |     |      |      |   |       |     |      |      |   |       |     |      |      |   |       |     |      |      |    |       |     |      |      |      |  |     |      |      |          |  |     |      |      |                                                                                                                                                                                                                                                                                                                                                                                                                                                                                                                                                                                                                                                                                                                                                                                                                                                                                                                                                                                                                                                                                                                                                                                                                                                                                |  |       |                   |              |                    |                    |   |       |      |      |      |   |       |      |      |      |   |       |      |      |      |   |       |      |      |      |   |       |     |      |      |   |       |      |      |      |   |       |      |      |      |   |       |     |      |      |   |       |      |      |      |    |       |      |      |      |      |  |      |      |      |          |  |     |      |      |
| st. dev.                                                                                                                                                                                                                                                                                                                                                                                                                                                                                                                                                                                                                                                                                                                                                                                                                                                                                                                                                                                                                                                                                                                                                                                                                                                             |                   | 1.9          | 0.03                                                                                                                                                                                                                                                                                                                                                                    | 0.03               |              |                    |                    |   |       |     |      |      |   |      |     |      |      |   |       |     |      |      |   |       |     |      |      |   |       |     |      |      |   |       |     |      |      |   |       |     |      |      |   |       |     |      |      |   |       |     |      |      |    |       |     |      |      |      |  |     |      |      |          |  |     |      |      |                                                                                                                                                                                                                                                                                                                                                                                                                                                                                                                                                                                                                                                                                                                                                                                                                                                                                                                                                                                                                                                                                                                                                                                                                                                                                |  |       |                   |              |                    |                    |   |       |      |      |      |   |       |      |      |      |   |       |      |      |      |   |       |      |      |      |   |       |     |      |      |   |       |      |      |      |   |       |      |      |      |   |       |     |      |      |   |       |      |      |      |    |       |      |      |      |      |  |      |      |      |          |  |     |      |      |
| <p><b>Time elapsed to generate 10 models: 3 min. 49 sec.</b></p>                                                                                                                                                                                                                                                                                                                                                                                                                                                                                                                                                                                                                                                                                                                                                                                                                                                                                                                                                                                                                                                                                                                                                                                                     |                   |              | <p><b>Time elapsed to generate 10 models: 4 min. 15 sec.</b></p>                                                                                                                                                                                                                                                                                                        |                    |              |                    |                    |   |       |     |      |      |   |      |     |      |      |   |       |     |      |      |   |       |     |      |      |   |       |     |      |      |   |       |     |      |      |   |       |     |      |      |   |       |     |      |      |   |       |     |      |      |    |       |     |      |      |      |  |     |      |      |          |  |     |      |      |                                                                                                                                                                                                                                                                                                                                                                                                                                                                                                                                                                                                                                                                                                                                                                                                                                                                                                                                                                                                                                                                                                                                                                                                                                                                                |  |       |                   |              |                    |                    |   |       |      |      |      |   |       |      |      |      |   |       |      |      |      |   |       |      |      |      |   |       |     |      |      |   |       |      |      |      |   |       |      |      |      |   |       |     |      |      |   |       |      |      |      |    |       |      |      |      |      |  |      |      |      |          |  |     |      |      |

- <sup>a)</sup> upon validation all the 3D structure elements comprised by the respective crystal PDB structure were excluded from the dictionary
- <sup>b)</sup> Matthews correlation coefficient (41) corresponds to the RNA FRABASE secondary structure parsed from the tertiary PDB structure
- <sup>c)</sup> potential energy of the final 3D structures were calculated with XPLOR-NIH ver. 2.2 program (26) using parameters from the "dna-rna allatom.param" file
- <sup>d)</sup> r.m.s.d. values for all heavy atoms were calculated with XPLOR ver. 2.2 program (26)
- <sup>e)</sup> INF<sup>cbp</sup> describes the interaction network fidelity (33) values over canonical base pairing only; the INF<sup>all</sup> describes all the base pairing interactions and base stacking. Base pair interactions and base stacking network from tertiary PDB structure were obtained using the RNAView (34) and MC-Annotate (35) programs, respectively.



**Table S8.** Accuracy of RNA 3D models predicted by RNAComposer, MC-Fold/MC-Sym (21) and iFoldRNA servers (15).

| PDB code and chain | Strand length [nt] | RNAComposer         |                    |                    | MC-Sym module       |                    |                    | iFoldRNA            |                    |                    |
|--------------------|--------------------|---------------------|--------------------|--------------------|---------------------|--------------------|--------------------|---------------------|--------------------|--------------------|
|                    |                    | global r.m.s.d. [Å] | INF <sup>all</sup> | INF <sup>cbp</sup> | global r.m.s.d. [Å] | INF <sup>all</sup> | INF <sup>cbp</sup> | global r.m.s.d. [Å] | INF <sup>all</sup> | INF <sup>cbp</sup> |
| 2HW8 B             | 36                 | 1.7                 | 0.89               | 1.00               | 10.8                | 0.68               | 1.00               | 9.5                 | 0.48               | 0.59               |
| 1I6U C             | 37                 | 2.1                 | 0.90               | 1.00               | 2.6                 | 0.83               | 1.00               | 4.1                 | 0.62               | 0.61               |
| 1ZHO B             | 38                 | 1.1                 | 0.83               | 1.00               | 10.6                | 0.76               | 1.00               | 11.4                | 0.58               | 0.62               |
| 2VPL B             | 48                 | 4.9                 | 0.79               | 1.00               | 10.9                | 0.74               | 1.00               | 11.0                | 0.67               | 0.78               |
| 2PXB B             | 49                 | 2.5                 | 0.91               | 1.00               | 11.1                | 0.70               | 1.00               | 16.2                | 0.31               | 0.18               |
| 1DK1 B             | 57                 | 2.4                 | 0.52               | 0.98               | 13.2                | 0.51               | 1.00               | 12.5                | 0.34               | 0.80               |
| 1KXK A             | 70                 | 9.3                 | 0.74               | 0.98               | 10.1                | 0.69               | 1.00               | 10.0                | 0.58               | 0.68               |
| 3AM1 B             | 81                 | 5.7                 | 0.78               | 1.00               | 12.3                | 0.76               | 0.99               | 21.5                | 0.54               | 0.86               |
| <b>Average</b>     |                    | <b>3.7</b>          | <b>0.80</b>        | <b>1.00</b>        | <b>10.2</b>         | <b>0.71</b>        | <b>1.00</b>        | <b>12.0</b>         | <b>0.52</b>        | <b>0.64</b>        |

**Table S9.** MolProbity RNA structure stereochemical quality assessment for the 3D models predicted by RNAComposer, MC-Fold/MC-Sym (21) and iFoldRNA (15) servers

| PDB code and chain | RNAComposer            |                   |                    | MC-Sym module          |                   |                    | iFoldRNA               |                   |                    |
|--------------------|------------------------|-------------------|--------------------|------------------------|-------------------|--------------------|------------------------|-------------------|--------------------|
|                    | clash-score, all atoms | outlier bonds [%] | outlier angles [%] | clash-score, all atoms | outlier bonds [%] | outlier angles [%] | clash-score, all atoms | outlier bonds [%] | outlier angles [%] |
| 2HW8 B             | 12.90                  | 0.00              | 0.00               | 92.78                  | 66.67             | 91.67              | 105.74                 | 13.89             | 77.78              |
| 1I6U C             | 14.31                  | 0.00              | 0.00               | 72.33                  | 43.24             | 97.30              | 104.86                 | 21.62             | 72.97              |
| 1ZHO B             | 12.23                  | 0.00              | 0.00               | 110.84                 | 71.05             | 92.11              | 103.63                 | 21.05             | 71.05              |
| 2VPL B             | 12.24                  | 0.00              | 0.00               | 172.57                 | 79.17             | 100.00             | 99.60                  | 22.92             | 66.67              |
| 2PXB B             | 11.36                  | 0.00              | 0.00               | 117.91                 | 71.43             | 93.88              | 106.52                 | 22.45             | 89.80              |
| 1DK1 B             | 19.57                  | 0.00              | 0.00               | 125.48                 | 66.67             | 85.96              | 109.30                 | 26.32             | 71.93              |
| 1KXK A             | 19.07                  | 0.00              | 0.00               | 95.74                  | 71.43             | 95.71              | 110.59                 | 22.86             | 72.86              |
| 3AM1 B             | 16.08                  | 0.00              | 0.00               | 123.61                 | 65.43             | 90.12              | 106.55                 | 25.93             | 71.60              |
| <b>Average</b>     | <b>14.72</b>           | <b>0.00</b>       | <b>0.00</b>        | <b>113.91</b>          | <b>66.89</b>      | <b>93.34</b>       | <b>105.85</b>          | <b>22.13</b>      | <b>74.33</b>       |

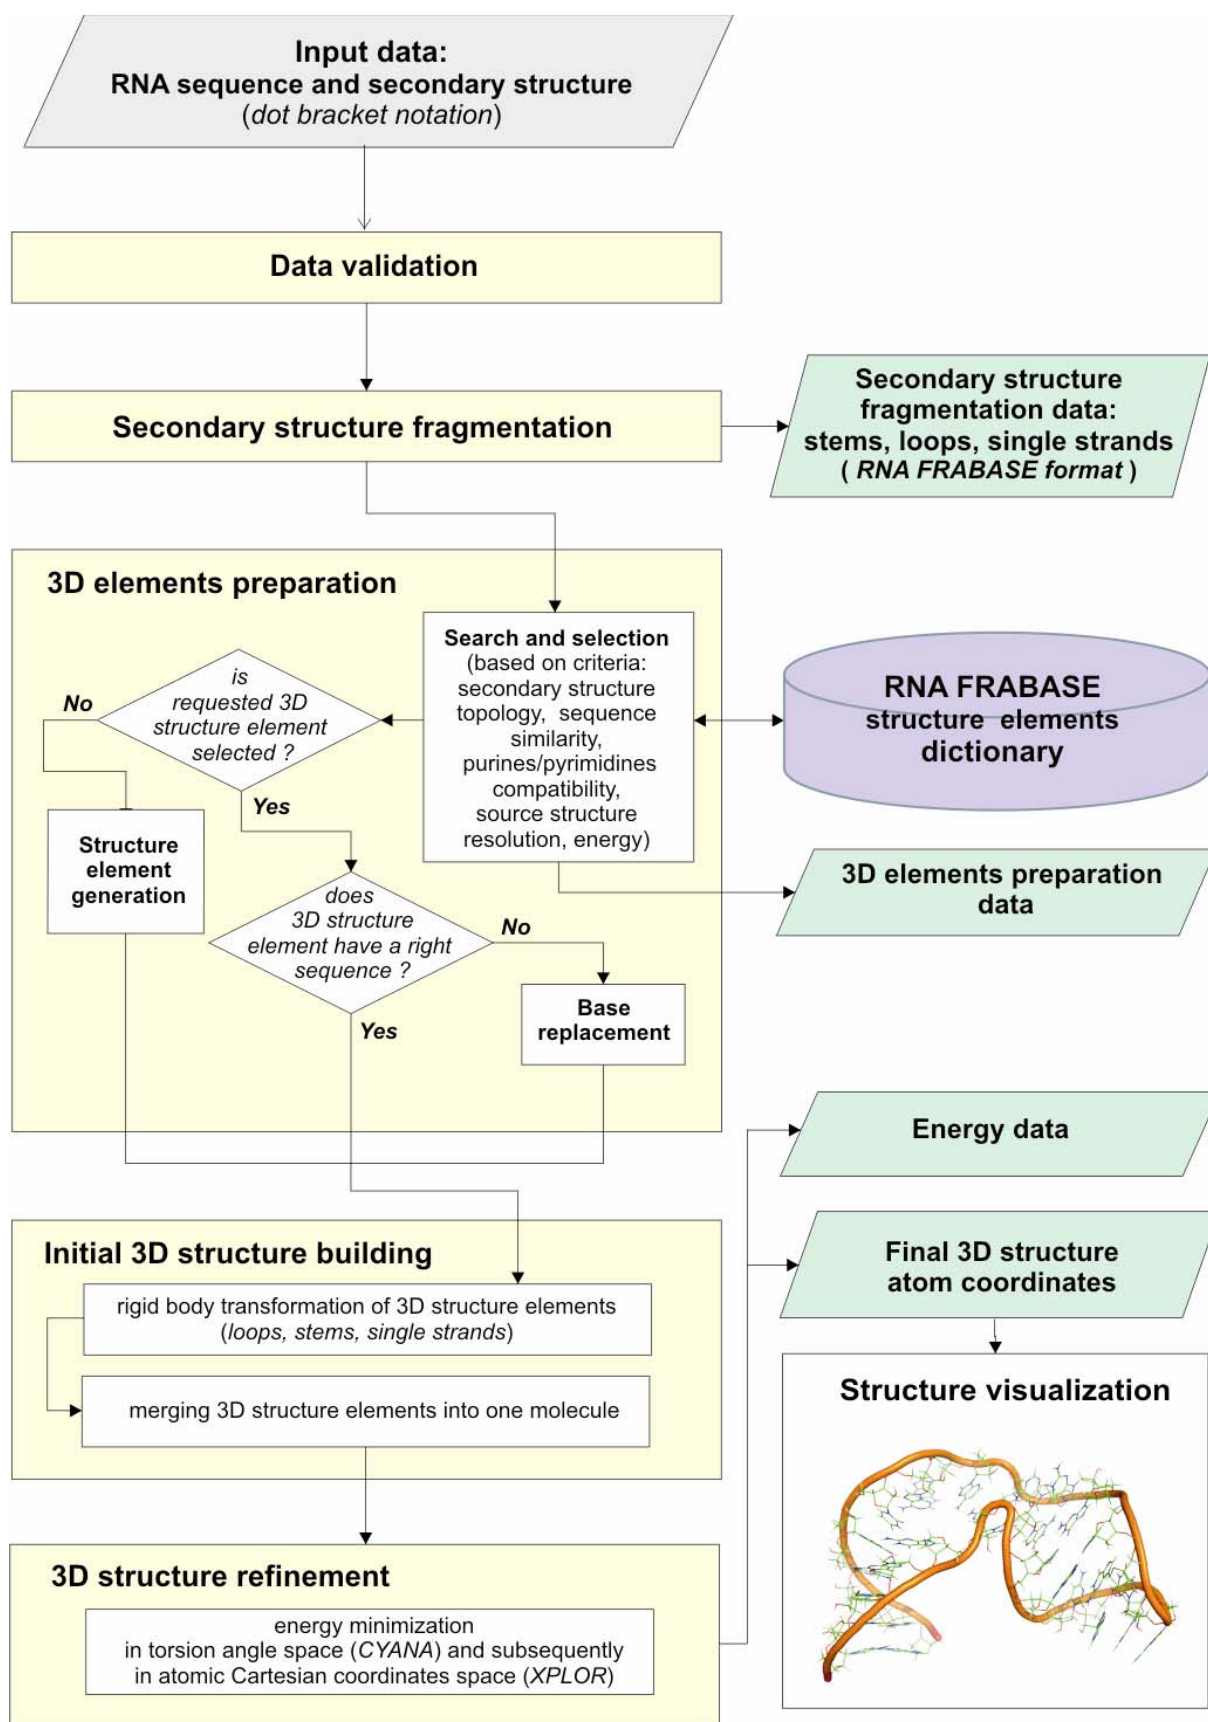

**FIGURE S1.** Detailed flowchart of the machine translation method to predict RNA 3D structures from secondary structure. User-accessible output files are shown as the rhombohedras (in green)



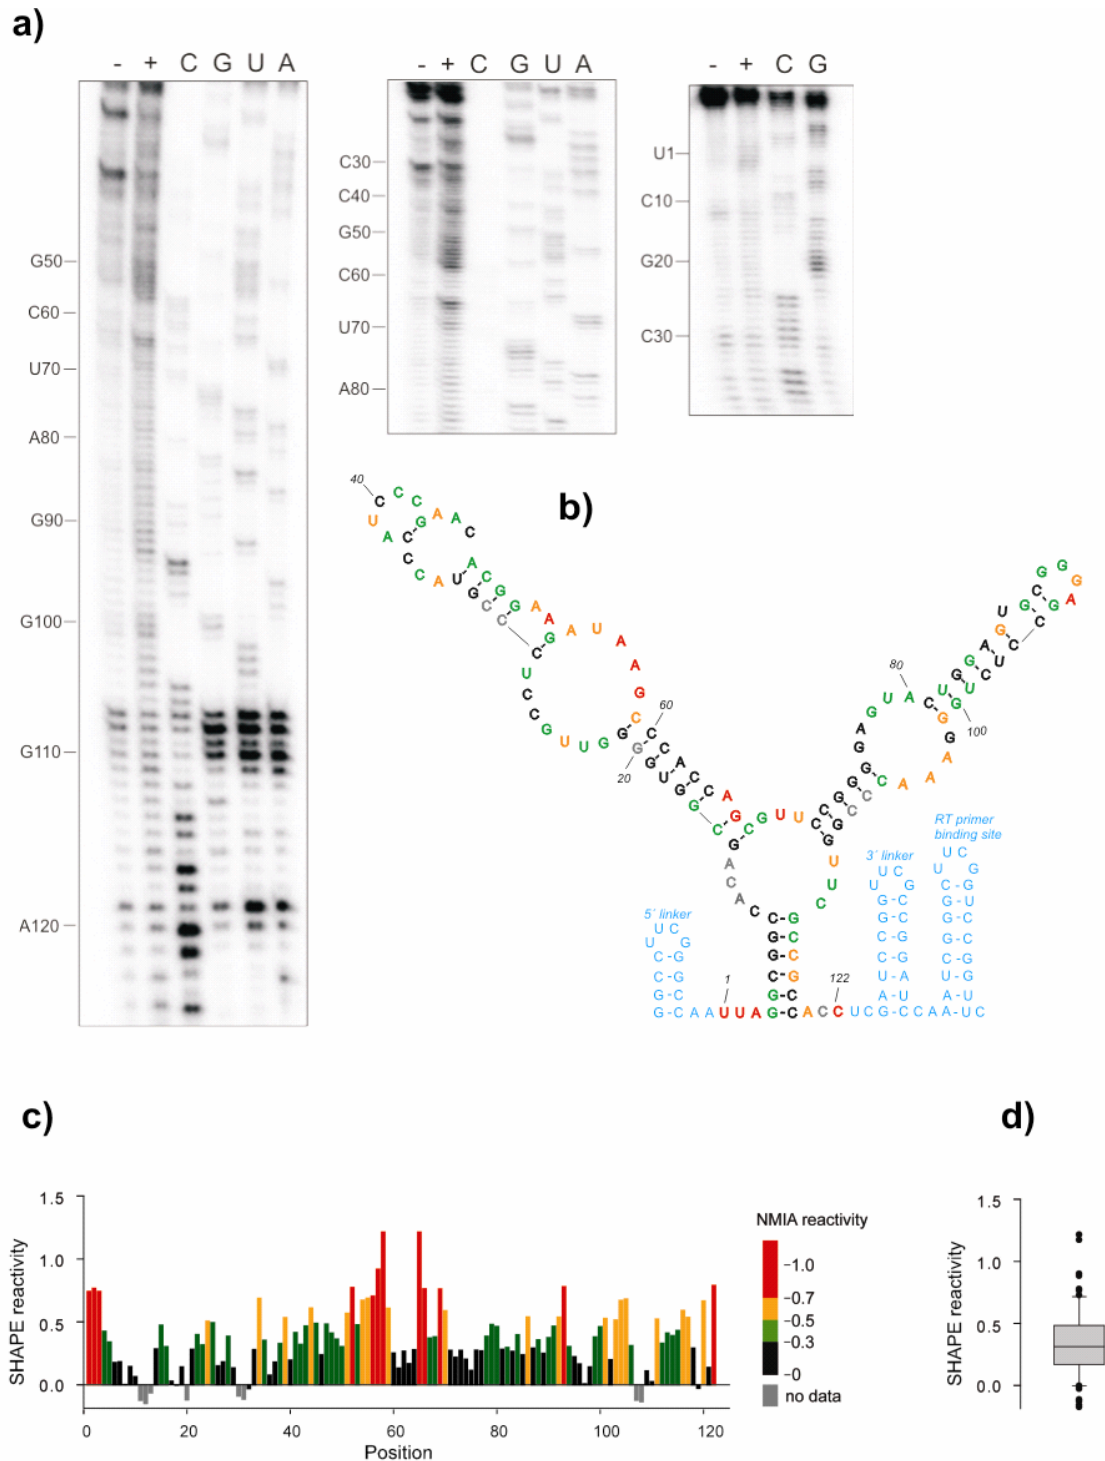

**FIGURE S3.** Determination of the 5S rRNA *H. Marismortui* secondary structure. **(a)** Typical gel electrophoresis patterns for SHAPE analysis of the 5S rRNA. Lanes (-) represent control sample with untreated RNA; lanes (+) NMIA modification, A, C, G and U are sequencing lanes. **(b)** Secondary structure of the 122-mer 5S rRNA containing 3' structure cassette and 5' flanking sequence to facilitate the analysis of entire RNA by primer extension (36). Nucleotide residues accessibilities to NMIA are given in colours and according to scale. **(c)** Processed SHAPE reactivities as a function of nucleotide position. Red and orange bars reflect reactive positions in the RNA. **(d)** Box plot analysis of distinct reactivity distributions for the 5S rRNA. Box outline middle 50% of dataset; the median is shown with heavy line. Circles indicate extreme values: 1.5 times the interquartile range (boxed). Horizontal lines above and below the box are the largest or smallest non-outlier values.
